# Supplementary material for: Mitochondrial DNA and Y chromosome reveal the genetic structure of the native Polish Konik horse population
Source: PeerJ. 2024 Jun 20;12:e17549. doi: 10.7717/peerj.17549 (PMC11193968; doi:10.7717/peerj.17549)
Supplement: Supplemental Information 1 — For each variant, the information includes its classification as either decisive in the Crown or not (Allocation), its specific location on the LipY764 reference (Felkel et al., 2019), the reference and alternate alleles, the derived state, and the type of variant. Flanking regions that were used to construct primers are also given. Additionally, the information about the KASPTM genotyping and the allelic signals observed in female controls are given as notes. The last column lists the studies in which variants were initially identified. [file peerj-12-17549-s001.xlsx]

## Sheet: Variant_info
Variant ID	Haplotype	Allocation	LipY764contig:position	REF	ALT	Derived allele	Variant type	Flanking sequences	KASP Female signal	Variant first described
fFQ	p	Non Crown	LipY764_contig226:3883	G	T	T	SNP	ATGTCTGGCTGCTGAAGTGGAGCACATGAATCTGACCACTAAGCCACTGAGCTGTGCCCCCAATTCTGTTCTTCTTGAGATGCTTTGATAGTTTGTCTGGACTTTGTCATTTCATCTGTTACATAATGTGTTGGTAAATGAAAGTTCATA[G/T]TACTGTTTCATAATGTTTTTATATCTGTAAAGTCTATTAAAATGTCACTAATTTCAAATTTTGGAAATTTGAGTCCTTTTTATTTTCGTGTCAAGTAAAA	no	Felkel et al., 2019
fBF	d	Non Crown	LipY764_contig228:8214	A	G	A	SNP	TTTAAGACATAAGTTAGACATGGGAATTTCTGAGGAGGAGGAAGAAATTACATTTGAGAGGGAACTGTAAAAGACAAAGGGAACATGTATTTCAACTGCAGGTAATAATCACTACCCAAGAAAGCTGCTCCTAAAAAAGGGGCAACAGTC[A/G]CCAGTTATTAAGGAAAAAAGGTGAAGAGAAAGTTCCAAGAAAAAGAAAACAAAAAAGCCTGTTAGTTTACCTAAAAAGACTGTGTCAACCAGAGCACAAAATGGAAAGGCTTAAGAAATCTGCACTCTTCAGAAAAACTTTAGCCAGATT	no	Felkel et al., 2019
sCO	db	Non Crown	LipY764_contig178:7326	A	C	C	SNP	AGTGGACATCATCAGAATCCCACAGTACTTCGAAGTACCATTGTACCAAGATGTTTGGCTGATTTTCTCTCAGTTGCAGTTTTACTTGAAAGCAAGAATTGTTCCAGTTTCCTTTCCATTCCAAAACTCTTATTGTTGTGGGGTTTGATT[A/C]AAAGAGTAAACTTCTGGTTAGTTAATAAATAATTTTGAAGTGATGTTTTAGGATAAACATTTGTTTCAGGATTCCAAGAAACCCATGAGTTAATAGTATATTTTAAAAAGAATTGGTTAACTTTTGAATGTGTGTAATATTTTGGAATCT	no	Felkel et al., 2018
sES	da1	Non Crown	LipY764_contig259:10235	T	G	T	SNP	ATTAAATGCGATATGTGAAGCTGAATCTTAATAGTTCATGGAGGAAAAAAGATAAACTTCATCTTGAGCTCAAGATATTTTAGGAGGAATTGGTGATTTCTTTCCTCAAATATTGATGGGTGTATAAGGTAGATATGTGGCATGGGAAAA[T/G]AGTCTTTCTTGCAAGGAACAGTATTTACACTAGTGCCTGGGTACATTATCCTGAAGATGTCCATCTTGAATTTAAATTACTGCCCTTATAACTTGAGTACTATTTATGATTCAAAAATTCCAATTTCACATTGTCAGGGTCCCTCAAAGT	no	Felkel et al., 2018
rBA	da1_N	Non Crown	LipY764_contig10:19042	T	C	C	SNP	TTTAATTACTCAAAATATATGAAAATCAGCCATCTACATAAACACCGGCATCCAGGTATCAATGTAAGTAAATGCAGGGCCTAAAATTATCATTACTTTGGGAAAAAATGGACTAAGAGGAAAAAAATTCCTGGATCATAAAATCAGAGT[T/C]GAAAGAACTTTTAATCAACATAATTAATAAATCTGCGATGAGGAACTAAACACTATTACCTAAGATATGCCAATTTCAAATTTTCCTAATGTCATAAGCAGCTGTTTTACCCATAGCAAAATCTAATCCCGGAATCAATATATATAATAT	no	Wallner et al., 2017
eTC	da1_G	Non Crown	LipY764_contig260:8493	G	A	A	SNP	TTGTTATGGAAAAAATCAGACTCTATCTTCTTGGCTGCCTTAGACAGAGAGGCTCTGAAAATTCTCACTATTCCCCCTGTAACCCCCCAAGTTTCCTCCT[G/A]CCTTCCTGGGACCTTAGGTCTCAGCCAGACTAATGCATGAGGTCTGTAGCAAAATATAAATGATGTAGGTTCTCTCTGTGGCTTCCCAATTTCCCGAGAC	no	Bozlak et al., 2023
eAJB	da1_R	Non Crown	LipY764_contig527:1909	C	T	T	SNP	ATGGTCATACATCGATTTTCTGTGACAGTAGCTTCTGTTGCCTCCAGAGATGCATGCCAGTCCCATTAATGCTATGGAATGCAAGGCAAATGTGTGAATA[C/T]AAGAGGAAGGTCCTTGAAACATTGATGCCACCTCATTCTTGTTGATCCAGCTCAAACACCTCCCTCAGCATCTCGGGAGCAGAGCTAATTACTCCTCCCT	no	Bozlak et al., 2023
eKZ	da1_Z	Non Crown	LipY764_contig114:11846	A	C	C	SNP	TCCTTCTCCTTCTTCTTCTCTTTCTCCTTATCCTCCTTCTTCTCCTCTGTCTTCTGCTTCTCCCCAAAGCCCTCCAGTACATAGTTGTACATCCTAGTTTTCGATCCTTCTAGTTCTTCCATGTGCAATACTAACTCAACTAGCCTTGATGAACGGTGCTAGTCTGTACCCACTGTCTGATCTGGCAAAACCGTGGGCCA[A/C]ATTGAAACACATGAACTTAACCACTCAGCCACAGGGCCAGCCCTATTTTTAATTTTTTGAAGAACCTGTATATTGTTCTCTGTAGTGATTGCATCAATTTACATTCCCAACAACAATGCACAAGGCTTTCCTTTTGTCCACATTCTCAGCAACACTTATTACTTCCTGTCTTTTTCATAATAGCTATTCTGGCA…	no	Bozlak et al., 2023
eAJP	da1_S	Non Crown	LipY764_contig212:13261	G	A	A	SNP	TCTTTCAAAATTGAAGGAGAAACTAAGACTTTTCTCAGAATAAAAAAAAAGCTGAAGGAATTCATAACCACGAGACCTCCCCCACAAAAAATACTAATG[G/A]GAGTCTGCTGAAATACAAAGATGCTTTATAGCATCACAAAGCCATATGAATTATAGGGTTCTCTAGTAAAGATAAATACATAGATAAACAGAGGATCCTT	no	Bozlak et al., 2023
eEB	da1_U	Non Crown	LipY764_contig31:23088	A	C	C	SNP	CCCTTTCTCTGTGGCATTCAGACTCAAATACTCCAAGGCATTGTTAATAAAATCCTTTGCCTCTGAATATCATATTGAAAATGTAACAAGTAGCTCTGTGCACCAATTAACAGATACAACATCAGCGGTCTGCAGAGTTGACCTAGCAA[A/C]GTTTATTTTTCATTATAAAAATCTGCGCTATTTCAACCCAGCACAGTAAAATTTACTCCAGTTTAATGGCAACTGATTAACTGTCTGGATCCTATTTAGTATAACTCATCTCTAATGGAGTTAGCCCACAAATCTTAAATTGAAGAGGATG	no	Bozlak et al., 2023
rBG	da2	Non Crown	LipY764_contig4:19212	CT	CTT	CT	Indel	AATCACTTTGCAATTAATTGGCATAAATTTCAAAATGAATTCAGTTTATTTTACCATTACTACTAAATGCCTTTATTTACTTCAGCAGTTTTTCTACAGAAATCGCTTAGATTGATTATATGCTAGAATTTTCCCTTTTGGGACCAAGAA[CT-/CTT]CATCTGAGTTTAAATGGGTGATTCATGCATAATAAACTATTAAAAATATGTTTTTTTAATTTTGAGAGTAACCTTATTGCATCATAAAATATTATGGAATCTTGAAAATACACAACAGGAAATAAAAGTCATCAATACTCACAATTCAG	no	Wallner et al., 2017
eLL	da2_L	Non Crown	LipY764_contig123:24097	A	G	G	SNP	TATCTATTTTTGAAATAAATCCTACAAAGTGATTATGCTAACAATGTTTGAATGCATTTCTTCTATATATTGTAAATGGATATATTCTATGTGTAGTATATTTGTGTAGGATTTTGTGCTAGATATAATACTGTAGAGCATACCATAATTCATTACTTGCATTCCTCAAGATCTACAGTGTTGTGCTTTTGAATTCTATT[A/G]CATAATTCTGAGCTAGGAAGGAAAGGCAATCTGTAACAGACATTTTATTTCAGTTGTTTCTATTACAATCACTGTAGTCCTATAGATGTAGGCTAGAAATAAATCAGTGTAGCTAAATGAATATATTTTCTATGTTCTTATTTTTCACTTAAAAATTTAATCTGAGGAATCCTTAAGAATGAAATGCTGGTAGT…	no	Bozlak et al., 2023
sAA	da2_M	Non Crown	LipY764_contig312:5283	G	C	C	SNP	CTACTCTCTTCTGATCTTCTTTCAAACTGTATCTTGCCCCAACCAACCCACATTGTTTTCTGAACAAGCACAAACTCAACACCACCTTGTGCCCAATATTCCAAACCTTGGCCAATCTGGAAAATGTGTGTGCCATAAGAATTAGTGCTA[G/C]GACCCCTTATGACTGCCTGAAAGGTTTGAAGATGCTACTGGAGG	no	Felkel et al., 2018
rBF	da3	Non Crown	LipY764_contig26:10753	A	G	A	SNP	GCCACTGGGCTGGCCCCTCTATTCCTAATTTTTTAAAAAAACTTTAAAAATAATTTAGATGAGTGACATTAAAATCATAAACATATGTTCATCATACTCAGTGCTTAATGGAGATGCCTTCAAACAATTTCATTATCTACCAATGTTTTA[A/G]AAGCATCATACAAAAGAGTCAGAGAAAAAAAAAACTACTGAACATATAAACTGGAAAAGTCATAATTATACTCATCAGCAGTATTACTGAACAATACAGCTCCAAATACCTCGGGGTTAAAAATTTAGTATATACAACTTCAATTTTCTA	no	Wallner et al., 2017
rAW	da3_I	Non Crown	LipY764_contig20:37008	A	G	G	SNP	AACTAGATATAGTCTTAGAATGCTTCTCTACCATTTTAGAAACACTCTTCTTATAAGACAATTACACAATTGCCTAGATCCTTTACTGCTTTGGATTATATAATTCTGAATGTAAACAGCATTCCTGTTTAAACTAAATTATATTATGCC[A/G]CTTTTGTTTCTCTATTTTTCAAGTTGAATTTTGATTCTTTTTTTCTAATGCTGGAAAATTACTTGAAAGTTGGAAATTTTGTGGAGATGATTTCTGGAGGAAATGCTGAAATAGTCTGTTAGTGTTTATTTTGAAAGACTTTTTTTTGAG	no	Wallner et al., 2017
eALC	da3_D	Non Crown	LipY764_contig180:17965	G	A	A	SNP	TGTATTTAGTTAAAGGTTCCTGGCTTCCTTCCTATGTCTTTGAAAGGAGGTGGATGGCCCATGTGAGTCCCATTCAGACCTTCAGGGCTGGCCTTGGACA[G/A]ATTCCCATGTGTTCTCCATGCAACTACAAGCGTGGCTTGTAAGATGATTCCTAGGTAAACATCACATTTTTTTGTGATGAAATCTTTCCTAATGAAATCT	no	Bozlak et al., 2023
eDC	da3_K	Non Crown	LipY764_contig20:38070	G	A	A	SNP	TTTAAACCTTTAAAGAATTTAGTTTCTGTAAAACTCTTAGTTACAGAAGTGTTCATTTGCCTGATTATACTCTTTTAAGTTCTTCTCGTTTTAGTCAAACTCAGCGAAGTCCCCATGTTTTTTATCGTCATGATTTAATCAATCAGCTTCAGCACAATCACGCCTTAGTTACTTTGGTAGCAGAAAACCTTGCAGCTTAC[G/A]TGAATAGCATGCGACCGTATGCTAGAGGTATGTATTAAAAGCTAGAATTTACTATTTTTAACTTTTAATTACTTTTCAAGAAAACTTGATTAATAATTCCTTTGTTGTTAATTTTACCTGTCTGTTCTTGCATATATTACAGTTGTTTTTAATAACCCTGAATTAATTTTATCCAGTATTCAAAGAACTTCTTA…	no	Bozlak et al., 2023
sAZ	da3_J	Non Crown	LipY764_contig158:6198	C	T	T	SNP	TCAATACTTAGTGCATTGGTTAGAAACTATTTGAGTTTCCTGTGTGGCAGGAAAGAATTCTACTACTGAATCACCAATTTATTTCAACACTATATATGTGTAAGTATATACATACTTACATATGTAGTACAGATAGATCTCACCATTCTC[C/T]GAGGTGATCTTTCTGCAGTGGGAATCAGAGAGTTTCAGAAACCACCACTCAGGGTCAATGCCTCATCCCACCCATCTCCCCATCCCAAACTTCCCCTTCCCCAAGGGTCGCCAAAGAATCAACAGCTGAGCCTTGTCTCCCTCAGGTCTT	no	Felkel et al., 2018
eNG	da3_T	Non Crown	LipY764_contig159:15614	C	A	A	SNP	TAAATATCTTTGATAGCCCTTTGATTGGGTGCTGGGGCAGAGAGAGCCCTCTGTTCTTGATTGCACCCTTCTAGAGTGGAGTTTTTGCCTGATTATTACATAATTACAGCAATAAGAATAGTTATTGGCCACAAAAGTCTTTTCAGTTTGCTTTCTGAAACATTTCATAGAGAATCTCAGATTAAACTTTTAAAAGCCTC[C/A]CAAGTCTAGGAAGTCAAGCAAGAATTTACAACTGCATTTTGCCTGTAATATGCAGATTTACTTGGATTCTTTTTTCTAGTGTTGCCCAGAGTATGAGGTTCCTGGGCCTGCTGGGAAGTGACCTTCCTTACTCACCTGTAGAGTAGGGAACACAATTACCCAGGTTCAGGCCACTCCTTAGTTCCTTAAATCTC…	no	Bozlak et al., 2023
sQ	da3_Y	Non Crown	LipY764_contig90:21274	T	C	C	SNP	GATTTATTTCATTTACCCCAGACCCTGGCAGAATATAGTCAAAGGACTTACCCACAGTACTACCTTTATTTGCTTTCCTTCATATCAGTCCTTCATGCAATGGATAAGCTGACTTCAAAATA[T/C]AGATTAGGTATTACATATAAATAGATATTAAGATACATTGAAGAAGGGAGGAAAATACATAAAAGGGAAAAAAAGCAATATGGACATAATATCAGTGTAGTAATTCAGTATTTAAAAACCACCTTCTGGACTATAGCTAACATATGTAAT	no	Felkel et al., 2018
rAY	da4	Non Crown	LipY764_contig60:5826	T	C	T	SNP	TGGCAGTGGATGTCAACTCAGAGCTAATCTTCATGAAAAAATGAACATAAAATAAAATGTTTCTAGCAAAGAATATGAAACATACATAAA[T/C]GGAATTTATGACATAATTGAACAAAAATGCAGTCAACAGAATCTGTCTGTAAAAAAAACATTGGTTCTTTATAAGAATTCATAGAGCCCATTATAAACACTTTAAGAAGTAAAAGAAATCTTGATTTAAAGAGTAAATGAAAATATGATG	no	Wallner et al., 2017
eWP	da4_E	Non Crown	LipY764_contig379:547	G	A	A	SNP	AATCCCCTCCTTAGAAATTGAGGGAATCCTCTTAAACAGCCTCTAGACCTCTTCTAAATTGTGGGAGATGGAAGATGTGAAAGGGCCTACCTTGATTGTC[G/A]TCCTGAATTTACCGTTGATACACAGTTGCAAAGGACTACCCAAAAGGTAGTACAAAATTGCTTTAAGTGTGCCAGAGACAATACAAATATTGGACCTCCA	no	Bozlak et al., 2023
rAX	daC	Crown	LipY764_contig359:7646	C	T	C	SNP	TTTTTCAACCATCACTTAATTTATAGAGAAAATCTGTTTAAGAAAGATAGTGTACAGGAAACAACACAACACCCAAATATTATCTCTGGCAAACAGTCTGTGATTAGTTGCCAGAATTATTGGAAAAAATATAATTGAAACCAAAATCTT[C/T]TGTAGAACCAGAAATCCTCTATGAAGACGGAACGAAATATCACCCTTTTATGGAGCCAAAAAGGCACATTGCATTACATACATCCTTGCAGGATAAAAATAACTAGTCGTCACTTAGAAGGAATTGACAGTACGGTTTGTCAAACATAGT	no	Wallner et al., 2017
rW	daC_A	Crown	LipY764_contig79:13451	G	A	A	SNP	ATCCCAGAAGTGCAACTGAATAAGCATTGACTGGTATCTGAATTTCAAGAGTGCTCTCGTCAAGGCCACGTTTTTGTATTTCAGAAGCTAATTTTTTAAAAAGAGAGAGAAGCAAAAGAAAAATCAATACCGTCGGTTAATAAATGAAAT[G/A]AAATAACAGTTCCTTCAAGGAGGATTAAATATCTATTTTCTGTGTGATTCTTTTGAAGTGGTATGTATGTTGATGGGTATACATGCATTTTCATTATTTATGTGTTAGTTAATTACTAACATATTAAACAGTATAATATAGTGCTTCAA	no	Wallner et al., 2017
eAPK	daC_Ak	Crown	LipY764_contig66:6724	T	G	G	SNP	CATTTAAACCTCCAAGTGTGGGAGTTTCTGATGATTTAATGGACATTTAAACATCCTCCACACACCCAATTGTTAGCAACATGAATCCAACACACGCAG[T/G]GTGAATTTTCAGAGTAACAGGAAGTGTCAGATGACCAGAAACAGTGAAATATATCTGTGCTGGCCACTCACCACACCTTCTGGGATGTGGCTATTTCCTC	no	Bozlak et al., 2023
rAF	daC_Ad	Crown	LipY764_contig112:2021	G	A	A	SNP	TATATAACATATAATAAATTAATATAAATGAATCAAAAATTAAAATAAATATAAAGTACACATATAAGTGTAGAGAGATTGATAGATAGTTTGACATGCATTTTCTGGAAGAACCTGTCATATGTGATAAGTAGATTTTCA[G/A]GTGGGTCCATGGTATCTATATTTTTTTTCACAATATCTATCTTTAATAGTCCACACAAACTACAATTTCACTTTCAAGTGAAGTGGAAGAAGTATTAATGTTTCTGTGGTAACAATCATATTATAGTACTGACTGAAATATAATTAATTG	no	Wallner et al., 2017
eLF	daC_Ad-m	Crown	LipY764_contig118:10097	G	A	A	SNP	GGACACAGTAATTACCACAGTCCTTCTCCAGCACATTCATCTGCTCTAAACTGTAGGGAGGAAATGAAGCAGAAGGAAACCCAGTGGAGAAATAGTTCTTTTATGTGTGGCAAACTCAAACATAGTTTAAATCGTGGAATGCCAACTTGTAATCTATCTTCCTTTTCCCTGATTATCAGCAATTAAGATAGAAGGTAAAC[G/A]TATGAGATTCAAAGAGATTTCTAAACACTTGGTAGCTGTTATAGCTAATGAACCTTCTGTTTAAATGAGACACCTGTGCCTATCTGCTCCTTTGGAGACTGCAAAGTTCTCATCAGTTCCTTTTTCCTTCCACAAGAATTGAAGCTAATGGTTTGTAATAACCACGGTTTTAGCTTTTTTTTCCTTTGTAGACT…	no	Bozlak et al., 2023
eARE	daC_Ad-s	Crown	LipY764_contig66:20874	G	C	C	SNP	TTTGTTTCAATCTATAGGCTTTGAGAAAGCCCTAAGAATTGCCTGATGAAGCCATCTCTAGAAATTGTGTGAGCCTAACCAAACAGCAGGTCAGCAGGTT[G/C]GTCTTCCCGTTGTAATTGTTAAGTTCTTTCAGGATTTTCTCAATAAGCAGTTTTCATCCAAAGTTGGGATTGGCCTTCAAACACAAGCATCTGAACTGGC	no	Bozlak et al., 2023
rOR	daC_Ad-h	Crown	LipY764_contig62:740	G	A	A	SNP	AGGAACAAATCCTGAGACTCCCCCATGTCTCTTCCTGTAGTTGGGATATCAAATGGAAATTGCACACAATTTCCCTGAGAAGAAAAATGTTAGGACAGGGTCCATGTTTTATTTTTCCACATTGGATTCGAACTACATAATCCTATCCTT[G/A]CTTTATAGTAGCATCTCAATAAATATTTGCTGAAGAAATGGAGGGATGGGTCGTGGTTCAGTAGTTAAGTAGGTAAGTAAGTGAATGGACAGGTGGATGGTAGATGAGTGACTAGAGGGAGAGGTGGTTGAATAATTCTGCAGAGTTTGG	no	Wallner et al., 2017
rAE	daC_Ad-hA	Crown	LipY764_contig198:10724	C	G	G	SNP	GCGCAGATATAGGGGCCTATGGAGGTGCACTCAAGAAATGAAAGCCTTCTGCCTAGTTGCACTCCTTCTCCCATCTTTGTATTCTCGCTCTGCCTCACTTTGGCACACAGGCTTATACCCTCATCTGAGGCCCCAGTCTTGCAGCTGTCA[C/G]TAAGGACACTCCTAGACTGCCT	no	Wallner et al., 2017
fWP	daC_Ad-hA1	Crown	LipY764_contig192:14225	C	T	T	SNP	TTGGGAAGAATGTTAGCACAGGACTAATCTTGCTCAACAAAAATAAATTGATTAGTTAATTAAATAAATACCAGTTACTAAATTCAAAGATATGATACTATTTCCTGCACAATCAGTGCTCCATTAATGCAGAGGGATTTATGAGTATG[C/T]TTGTGTGCCCATATATTTTTTTTTTAAAGATTGGCACCTGAGCTAACAACTGCTGCCAATTTATTTTTTTTCTTTCTGCTTTTTCTCCCCAAATTCCCCCAGTACATAGTTGTATATTTTAGCTGTGGGTCCTTCTAGTTAAGGCATGTGG	no	Felkel et al., 2019
qAA	daC_Ad-hA1a	Crown	LipY764_contig24:28814	C	A	A	SNP	AGGGACACTCCATCATGAAGAAATAATCAGATTCCTTGACTCCTGCTCTCACTCATCCTCAAAGCCAACAATGGCCAGCTGTGTCTTTCCTACATTGCTCTATTCTGACTCTAATCTCATCTATTTCCTCTCTCTTCCATAACTAAGGG[C/A]TTTTGTCGTTAAATACTGGGCCCACCATGATAATCCAGGATATATTTTTATTTTAAGGTCAATTGATAAGCAAATATAATTCCATCTGCAACTTTAATTCATTTTAGCCGTATAATGTAACATATTCACAGATTCCAGGGATTAGATTTGT	no	Remer et al., 2022
eAPS	daC_Ad-hA2	Crown	LipY764_contig46:9996	CA	C	C	SNP	TTCCATTCACCGATAAATTGCGAGCAGGGACAAATTTATCATCAAGCTATGTAAGACACCACTTTCTTTTTGCACAGGAAAAACATCCCCCAAAACAAAC[A/]AAAAAAAAAGGCGGCGATGTTAAAACCAATAGAAACACAATAGTTTTAGATGACTGATCTGAAAAACCTATGAGCTAAATTTGATTATGGGAAGCTGCC	no	Bozlak et al., 2023
fTA	daC_Ad-hB	Crown	LipY764_contig59:25124	A	C	C	SNP	AAATACAAAATCCCTCATAAGTAACCTAACAGTGCACCTAAAGGACTGCAAAAAGTTGAACCAAGAAAGCCCAAATCAGAAGAAGGAAGGAAATAATAAAAGCGAGAGCAGAAATATGTGAAATAGAGATGTAAAAATATAAGAGAAAA[A/C]AAAGCAATGAAATCAAGAGGTGGTTCCTTGTAAACATAAACAAAATTGGCAAACCTTTAGCTAGACTCAACAAGAAAAAAGAGAATGGCTCAAATAAATAAAATCAGAAATGAAAGAGAAGAAATTACAATGGACATCTCAGAAATACAAA	no	Felkel et al., 2019
fXA	daC_Ad-hC	Crown	LipY764_contig207:4276	C	T	T	SNP	ACATCTGCTTTCCCCATCTTCCACCCAGTGTATGAAGGGGTAATGGGTCCCTCTTACCTCTATCAGTTCTCAGTAGGACACAGATTAAGACCCAAAACACAAAAATTAGTTTCCTCTAGTTACTAATTACATTGAAAGCATAGCTGCCT[C/T]ACTGTTTTATCCCATTCAAAATTCTCTTCCGAAAATATTCATTGCATTCAAAAGACATTGTGTTTCATAGGTTAAAACAACTCCTGAACTCCCAAAAGAATGCAGAAAAGAAACCCCAGAAAATTAGAGAACAGGAAGATATTCTGTAGTA	no	Felkel et al., 2019
eAPN	daC_Ad-hR	Crown	LipY764_contig40:15401	A	G	G	SNP	TAGAAAACTTAAATTAGGAAGCTTTCCCTGGAGTTGGTGGGATCTGAGCAAGAGCGCTACGCCACAATAAGCAGATTTAGAATTCGGCACAACCATGACA[A/G]GTGATATAATATCTGGCTTTGCTGGCTATTATAACCAAGGAATAATCCCACAGAGAAGCTGTCAAACAGAAGAGAAAGAAAAGCCCGTTGTCAAAGGGCC	no	Bozlak et al., 2023
rDT	daC_Ad-b	Crown	LipY764_contig367:4708	T	C	C	SNP	TTATGAATTATTATCTAGAACTTTATGCAAATAAATTTGTAAGGGAAAGCCACGCCCCACACTTTCTTCTGGATATGAAAGCTTGATCTCATTGACAAATACAGGAAATTTAAAAGCATTAAATAATATGTATGGTTTTATAGTGAGTTA[T/C]AGACAACTTAATTAACCTTGTTCATGCCTGCAGTTCAATTTTAGTATACTATGTAATTACAATCAAAGAGATTACAATAGACTTTGACAGAATATTGCAGATGCATTAGAATGTAAAATGCAATAGAAGAAAAAATGAGAACTTTCTAAA	no	Wallner et al., 2017
eAPU	daC_Ad-bF	Crown	LipY764_contig174:14870	A	G	G	SNP	TCCACATGGTTAGTTGTTGCATATATGAACAGGAGACCCATAAGACGTGGATGGGAAGAAACACTCTCACTGATCAAGAATAGGCATGGGCATTCCTGTG[A/G]TTCCATAGAAAGGAAATGTGCACCAGTACACAGAGGAAGACATTAGAAATATTTTGTTTCATAAACACTTAGAGTCTAGACTTGGCCACCAGATAACTCT	yes, FAM	Bozlak et al., 2023
eAPT	daC_Ad-bS	Crown	LipY764_contig134:2589	T	C	C	SNP	GTGGTCTACTGCCTTTTTTAATTAGTACATTTTTCTGACACACAGCTTGCCCATTCATATAAACATTTTCTATGCCTGCTTTCCTACTACAACGGCAGAA[T/C]TGAATTTTTTCAACAGAAACTGTATGGCTTACTAACACAACAATATTCTCTATCTAACTTTTAGCAAATGTTTACTAATATCTGGTAAAAATTTACATAA	no	Bozlak et al., 2023
eBZ	daC_Ad-bM	Crown	LipY764_contig14:6480	C	T	T	SNP	GGCAAGGAAGGGAGAGAGGAAAGGAGGGAGAGAGTAAAAGACAGATAAAACGAAAGTATATTTTATATAACAATCAGATTATTTATGTATTTTATGCTTAAATTAAAAGCATAAATTGCACTATTGCAAATCCAAAATGTGTGCAAAGCCATTTCCTGTAATTCTTTTGTGGATTCCATAATGTTCTGAGTGCAAAAAGC[C/T]TTCCCAGAATTTTTCAGACAGAAGTCCCTGGAACAGAGAATGCTTCGTTTGCTTGTTGTCATCAATACTCTAGTTCCCAGAACAGACAAAAGATGATGAGCTGCAGCTCTTTCGGAATGCCATTTAAGAAGAATCATTTCTAGGTAGAACGTGCCAGTACGGAGGTTTTCTACAAATGTAAGCTACTGTCAGAC…	no	Bozlak et al., 2023
eAPX	daC_Ad-bP	Crown	LipY764_contig37:5530	A	T	T	SNP	ATGATTTTGCCAGTGCCACCTCTGTTGAACCTATCTCCGAAGGATTCCCATTATTCTCACCCACATTCCAAACATAGTTCTTCAGTTTTCCTAGCATTTA[A/T]GTGAGGTGCTCAGGAGCTCTTCAATATACTCTTTTACCATGCCATCAGCCTGCATTAGTTCCTGCTCCTCAGCATGAATGCTTAGCAATAGAAATGGACA	yes, HEX	Bozlak et al., 2023
fSA	daC_Ad-bA	Crown	LipY764_contig39:8533	G	A	A	SNP	GGAGTTTATGCCCTGTCCCAGGACATAGCTGAGTTCTTTTTATCAGCATAGGTCTTACAGCCAGAAGAATTTTATGCTCCTCTGCTAGGAGTAGAGAGTTTGTCTGCTATTCTTTACCTAACTGTAAACATTCTTTGCCTGGCCCCTGG[G/A]GATGATAGCATTTTCTGCACCTCTTGTCAGGGTTTGAAGTATTTTCTTCCTCTGAGACAAGGATTCAGGGAAGCATGTGGGTCTTTATATGTTTCCCTTTGTGTCTGTTGGTCATTTACTTCATGCCTGCACCACTGAGGTAGTCCCCTAC	no	Felkel et al., 2019
qH	daC_Ad-bN	Crown	LipY764_contig6:9425	A	G	G	SNP	TGTTGATGAACATTTAAGCTATTTCTATTTTTTTCACCTTCAAAGATAATGTGGCAAGAAAAATCTAGTGTGCGATTCCATGTGCACAACTCAGAGAACTTCTCTAGGTTACAGATCCACAAAGGTAGGGTGAGAAATTCCATTGCATC[A/G]TGATTTATCAAGTAACATCCATACCAGCAATGTATGAAAGTTCCCTTTTGTTTGTGTTGCCAATTCGTTTTTTATGAGATGGCATTTTCCTGACTGCTAGAGAAATATAGTAACTTTTCATTTATTCAACATCCAGGTTTCCCTTTCTGTG	no	Remer et al., 2022
qCU	daC_Am	Crown	LipY764_contig158:20638	T	A	A	SNP	AGTGCTGACAGAAATATAGTTGCCAACCAAGAAAACTATACCCAGCAAAACTGTTATTCAAAAATGAAGTAGAAATTAAGACATTCTCAGACAAACAGAAGCTGGGAGAACTCATTACCACTAGAGCTGCTCTACAACAAATGTTAAAG[T/A]GGTGGCTTAAGTCAAACGAAAGAGTGCCAGACAGCAGACAACAACATGCATATAAAGCTCTCTGGTAAAGGTCAATGCATAAAGACAAATATTGATTTCTGCAGTATTGTAACGTAGGGACATATATCACTTTTAATTCTGTATAAAATTT	no	Remer et al., 2022
qCI	daC_Am-a	Crown	LipY764_contig104:2521	G	A	A	SNP	ATTGAGATGGCAAGATTACCCTGGGACTATTGCACGGGTCCAAAGTAGTCACAAGCATCCTTAAAAGTGGAAGATAGAAGGAGAAGAGAAGAGTCAGAGT[G/A]ATGTGATGTGAGAAAAACATGGTCAGCCATGGCTGTCTTTGAAGATGGGAGAAGGAGACCTGAGCCAAGAAATGATGGGGTCTAGATTCTGCAAAAGACA	no	Remer et al., 2022
fTT	daC_Am-s	Crown	LipY764_contig84:12989	G	C	C	SNP	GGCATTCCCGCCCAGGAGGAGCAGTGGTGTAGCTCAGACATGTGGAGAATTAAGAATTAACTTTCCTGAAGATTTGTTTGGGTATGCCATCTGGGTGTTC[G/C]CCTTCTTATCTTCTAACCTGAATTTTTAAAACTTTATATAAAAAGATAGATTTGCTTATTCTCTGTAGTAGTTCTCTGAAGCAGTTTGGAATTAATCAAA	no	Felkel et al., 2019
rX	daC_Ao	Crown	LipY764_contig296:1984	G	T	T	SNP	ACATGCAATTTTCAACCTGCACTACCTGATCAACGAAATCAAAATAAATTCCGCACATACCCATATTATTTCCTATTTTTTTTTTTTCTTTCTTGTATGACACAAGCTTCTTGTCACATTCGAGTCAGGGTCCATTAGAGTTTTATCTTT[G/T]CGTGTGGAATAAGATGACCAATGTGGTGATTTCTGTTCTGCACTTGTCAGAGTCCCCATAGTTATAAATAAAATCATCTGATGAAGGTTTAAGAGCACTGGTAGTATTTTGCATCAGCCAAGGGAGTATGAGTCTTAGAAATTGTTTTCC	no	Wallner et al., 2017
eNF	daC_Ao-b	Crown	LipY764_contig159:11670	A	G	G	SNP	GTTGCTCTAGAGCTTATCATATACATATTAGATTGTATGAATTTACTTGGCTATGTACTGATGTAATTCCTATGTGATATAAAAACCTTACTTTTATAT[A/G]TCTCTATGCAGTGCGGCCCTCTTGTTTTATTTTTGTACGTTATGTCTATAAATGCCACAGTTCCAGCAATTATATTGTTGTAATATATAAACTATATGTA	no	Bozlak et al., 2023
eRA	daC_Ao-bC	Crown	LipY764_contig215:903	T	A	A	SNP	TTACTACTTTTGCTTGCCTAATTGCAATGGCTAGAATTATAGTGGTAAGTATATAATCTTGACCTGTTCCTTATTTTGAGGGGAAACATTTAGTCTTTCACCATAATGAATTTAGCCATGCGTTTTTCATTCTTACCTTCTTAGGATAAAAGAGAGTTCTGCTTTTATTTTAAGTTTTCTTAGAGCCTTTATTCAGAATG[T/A]ATGCTGAATTGGAAGATGCTTTCTCTGCATCTATTGAAATGACCCATGTGGTTTTCCTTTTTTAGTTAATATGGTAAATTACATAAATTGCTTTTTTTATATTAAACCACTCTTGTATTTCTGAGTTAAAAATCTTGGCCAAAATGTATTATGATTGTAATACATTATTGGATTCAGTTTGTTAAAAGTTTGTT…	no	Bozlak et al., 2023
eASA	daC_Ao-bB	Crown	LipY764_contig89:24464	A	G	G	SNP	GGAAATCCTGCTATTTGCAACAACATGGATAAATCTAGGGTACATTATGCTAAATGAAATTAGCAAATACCATATAATCTCACTTACACATGGAATCTAA[A/G]TAAATAAAGAAAAAGCTACACTTATAGAAACAGAGAGTATATTAGTGGTTGCCAGGGGCTCATGCATGTGGCGGATGAGGAGATGCTGCTCAAAGGGTAC	no	Bozlak et al., 2023
sE	daC_Ao-n	Crown	LipY764_contig398:2471	G	A	A	SNP	ACATTTAAACTCCCTGTCCAGCATAGTCCTTGGGTGTGACAGGATTTGTTTTTTCTGGAAACCATTTTATGAAGAAAAAGCAAGTGTTCAAAAAGTAGCAGGTAGCTGAATATTGACATACCAAAAGGGTTTCAGGAACCTCCTTATCAA[G/A]CAAACCATTTCATAGGCACAGATTGCTAATAATCATGCTGCCTTTGAGTATTCAGTCATTATTTGTCACCTAACTTGACAAATCAGTATCCTCAATAAATAAGTTACGGAAAGTACTATAGTAGATCCTGATAATACAACCCACACTATC	no	Felkel et al., 2018
eATU	daC_Ao-nN	Crown	LipY764_contig78:15787	C	G	G	SNP	GAATGCGGGTATTAGAGGACTTTCTGCGTGTATATCTTCTGTGCTGACCACATGACTCTGCTGCACTAACTCTGCCCTCTTTCCTTGCTCCAGGCTCAGA[C/G]GGAGCACACACACACATAAACACACCCTGTTGAACTCCTCCTCCTAGTTCAAAATTGGCTCCCAGGTCACCACAGAGAACAGGCACATAGTAGTAGAATG	no	Bozlak et al., 2023
fUP	daC_Ao-nM	Crown	LipY764_contig105:5694	A	G	G	SNP	GAAAAACAATCTGTGTTCTAGTAATACAAAGAAAAGCTATACAGCAATGAGTAAGAATAATTACATCTATATAAATCAACCTACATGAATCTCTGAAAAC[A/G]TAATATTCAGGGAAAGAACCCAAAGTGCGTGTACAGTTGGCTCTCTTATACAATGTTCAAAATCAGGCAAAACTTAAGAATATATTGTCTAACAATAGAT	no	Felkel et al., 2019
sC	daC_Ao-nM1	Crown	LipY764_contig245:193	T	C	C	SNP	TCATTATATCTTATCTCCTCTGACTGTAACTGCATTAAATATCAAGAGCAAACAAAACAATAGAGAAATTACACAGGAAATTAGAAACATTTATAATTAAAATATTTTAAATATTACAAGTAAAATTTTGAGGGTGCAGCTAAAATAATA[T/C]TTAATTGGAAATTTTTAGACTCAAACGTTAATTAGAACAGAATAAAGTTCAGAATAAATGATTATCCAATCTAAGAAATTAGATAATGAATACAGAATAAGCTAAAAAGAAAAAAGTGAGAAGATGGGAATGATAAAGATAAAAGTAAAA	no	Felkel et al., 2018
fVX	daC_Ao-nM1a	Crown	LipY764_contig168:8736	A	G	G	SNP	ATTTTTATGGGGTGGTTCTTCTTAATGTGGAAATGTAGATTTTGGTGTGAGGCTGGCCACTGATGATGTACTTGCTCTGCAAAACATGGGACTCCATGATTGAGTGGGTTTCAGAAACACTATTCCTGATGCAACATTGACATTGATAA[A/G]TTGGGTCATATTTGAAACCAGTTCAGCTGTTTCATGTGGCAATGGAGAAAGGATAATCAGTCTTTTTCTCCCCCTTGAATTTGGAGCACAACGCCTTTTTTCCCTCGTAAATTTCTAATACATGACCATATACACTCTGACTTACTCTCAT	no	Felkel et al., 2019
qCB	daC_Ao-nM1b	Crown	LipY764_contig84:9825	A	T	T	SNP	AATACTGATAAGCTTCTAGTTCCATATCATAAATATCTTAACCTTCTTGAGGAAAGAAATAAACTGTATATATATAAATATAGATATCTTCAATATTATTTAACATGTGTTCTAAATAATACTGATAGTAATAGCCTTCCAATAACTGA[A/T]TTGGAACTTACCATTGTCTATTATTAGTAAAGAAGATGGTCCTTTATTCATTACAAAGTTGCATATGTTAAAATTTACTAAACACTTTTAAAATTTTATTCTTTTTCATTGGTGCACTGAGGGAATCATGTGGTCCACTGCCTCACATCAG	no	Remer et al., 2022
eATS	daC_Ao-nM2	Crown	LipY764_contig405:3153	G	C	C	SNP	CAAGCAAAACCGAGACAAGCTGCGGCGGAGGAAGAGCCGGGCAGCGCCGCTTTGACTCTCAACAATGCTCCCATCAACGCACGGGAGAAAAGTCTGCAA[G/C]AGGCTGAGTCGGCCACATCTGCAGGCGGCCGAACTCTTAAAATGATCTTTGCTTCACAGTGCAAGACCCATCCTGGGCCCCAGCGGCTTCCAGTTCTTCT	yes, FAM	Bozlak et al., 2023
fZC	daC_Ao-a	Crown	LipY764_contig345:3648	T	C	C	SNP	AAAACGCACAGTTGGGTTTTGTTTTTGTGTACACTCTGACCACCTCTGTCTTTTAGTTGGTATATTTAGACCATTCAGATTTAAAGTGATTATTGATATAGTTGGGTTAATATCTACCATAATTGTTTTCTACTTGTGGTGCCTATTTT[T/C]GTTTGTCCTATATCTTTACCTGTTTTTTCTACCTTCTCGAGTTTTAATTGAGCATTTTATTTGAATTCATTTTCTCTCTTCTCTTAGGATATCAATTATACTTCTTTTAAATTTTTTTTAACACTTGCCCTGAAATTTGCAATATACATTT	no	Felkel et al., 2019
fST	daC_Ao-aA	Crown	LipY764_contig50:29378	T	A	A	SNP	CTGATGCATTGTAAATTAAGAGGACTGAAGGAAGTCTTAACCAGCAAGTGAGAAAGTAACTTGCAGATAGATCAAAATCTTCTTATTTTTATAAAATTACATGTAAGGTAAATTTAATTTCCCTAAATCAAGAAATGATGGATTCTGCA[T/A]TTTCAGGGACACCGTCATGATGACATCTACTTCTTTCTTTTTAGCCAGAGGCTTCAACAATTAATTTCTTCCTTACTACCTTTTGAAGAAGCCAGATTTCAGATGAAAATAAACCTAATGTTCCCTGAATTCAAAATGAGATTATGGAAAT	no	Felkel et al., 2019
fUS	daC_Ao-aA1	Crown	LipY764_contig107:18904	T	C	C	SNP	GAAGGTGTCACCTTTATCTGAGATGCACCCAGAGGCTACCAGCTAGATATCATTTCACCAAAGGACTGAGCACTTTTCTTTCTGGTGATTTTAAGTTGCTGTCTGAGGTGGGGGAATTTGTGTGTGGGACTTTAAGAGACAGATTTTTT[T/C]TTTGGCTTATGTCCAATATCTTTTCTGGGGCTATTCCTCATTGCAGTTAACAGCCATCAAAGCCAGATACTATGAGACTTATCTCACTTGTACTGAATCTGAAGTATGCTTATAATGAGAATGCACCTCTGTTCACATCCCTTCTCCTCAA	no	Felkel et al., 2019
rY	daC_Ao-aA1a	Crown	LipY764_contig2:26649	TG	T	T	Indel	CAAAACATGTGCCAGTTTCTTTCGTGAGAAAATCTAGAAATCAACTATGATGTTCCCACCCCAGGCAAGCACAAAGTCAACCACATTAAAGCTCTATGAGAAAATAGTGGCACACACTCTTCAGAGCCCCTCTTCTTGCCACTGTGGT[GGT/GT]AGTATCAAGAGGTGGTTCTAGGAGGAGGGGTTATGGAGAATGTCATGGAGACAATATTTCTCCTAGATGAAAAACAGAAAAGAATGGAACTTTTGTCCCATATCCAGACTTCTGGTAGGACCCTCCAGAGTGCTTGTTTCTATTTTGTCT	no	Wallner et al., 2017
fSE	daC_Ao-aA1b	Crown	LipY764_contig41:8032	T	C	C	SNP	CAAAATTGACCTTTCAAAACTTCTTTGCTTTTTCCCTTCTCACTTCCTATCATGTTTATCCTGGAGATATATATTTAAGTTACTCTTCCAAGTATCATCAGAGCTTTGCTCAGAGCCCTTGCCTATGGAAACAGGACTCCCTTCTGAAA[T/C]TGGAATTCTCTCCCAGTACACTCCATGTTCTTACCATGCTTTATTTTATTCAAGAACTAGAAATACACAATACATTTGGCAACTACTGGGTAGCTTGTTTGCATTCTGTTTCCTTTCTCTAGAAGATAACCTCACTGGATCATGAACTGAG	no	Felkel et al., 2019
qDX	daC_Ao-aA2	Crown	LipY764_contig254:3775	C	G	G	SNP	GATAGCTATTTACTTTATTGAAAACAGTATGTCTGAAATATGTCCACTTATTTTAGGTAACTAATGAGTGGAGTTACCCCAAAAGAAGTAAACTTGTAATTGACATACCTAACCTGCCCAGAGATTTCTCCTGGAAAGAAGGCTACAGT[C/G]TGAGTTTCACATTTACCTTTAGAGTCCAACAAACCAACAAATATTTGCCTGACAGTTGTTAGAATAACTGCTTTGCCCCTGCTGCCTGCAGGACATTCAGAAATATTTATGTTTGGATACACAGTTCTCAAAAAATTATAACAGACTTAGA	no	Remer et al., 2022
qEW	daC_Ao-aA3	Crown	LipY764_contig351:2301	T	C	C	SNP	GATACATCTTCTTGTAGAAAATGACTAGTCATGCTTCCCTGGCGCATACTTTTGCAAACTATTTGCCCTATTGGCCTCTCAGGGCTCTTTGCAAACTTTTTGCTCTGTGATTTTTCTGTATAGTTCACAACAATGTAAGAGAAATGTTC[T/C]ATATATTTAAAAACAATTTCAAATACTTTTTATTTCGTCCTTGAAGTGAAGTACTTCAGCAGTAATGCAACTCAACTCTGAGTGTCTAGATCAGTGCTTTTCAAAATTTAGCTATTTTAAAAGCAGCTTGTTTAAATACAGCTTCTTGAGC	no	Remer et al., 2022
qGD	daC_Ao-a1	Crown	LipY764_contig95:4299	CT	C	C	Indel	TGTGTAGGTTAATATTAAAAATAGCAGCTGATATTTACTGAACACTTGCCAAATACCTGACACAGGGCCCAGCACATCCCTTACATTTTCACATTTACTGC[T/-]CATGACAATTCAAGAGATGGTTTTGTAGGTGTAGAGACTGAGGCCTAACGTAGCTAAGTAACTAGCTAGGAGTAGTGATACCAAGAGTTAAATCCAGCT	no	Remer et al., 2022
qDR	daC_Ao-a1D	Crown	LipY764_contig229:14454	G	T	T	SNP	GAGAATGTGAAAGAATAATTAATAAAACATGCTCAGGGATCAAAAAAGTAGGGCAATGATATTCAATGTTAGAGTTTTATCAATGTTGAAGAATCATCCAACCATGTGTATGATACTCATATTTTGATCCAGATAATGGGAGAAATCAT[G/T]AGTGCCAATAGGGCTCAACTCATAATATGTGTTTGAAAATTTTCCCATGCTATATTTTCAAAAGACTTATCTAAAAGAAGTGCTATTTTGTGCCTTTGTTTATGAAGATATCTTCTCAGAGGGGGGAAAACCAAACTGGAGTAAAACAAAT	no	Remer et al., 2022
qW	daC_Ao-a1D2	Crown	LipY764_contig22:11458	C	T	T	SNP	CTGTGTCCCAGAGCAGCCTGAGTTAGGTTTTTTTATATTTAAAAAACAATTAGGTTTGTATTAACAGCTATACATCACTGCTCCTTTGCTGCCGGCTCAAAGGTGCAAAGGTTATAGTTGGCCTATTTGATGAGGAATCAACATGATCT[C/T]GTGTAATTCCAGAGATGTCTCCTGTGCTGTGGGAGTGCTTCACAATCATAATTAATAGAAACAGGGACAGTGTCTCCTTTGTATTTTTCATAAAAACCATGTAGCGCACACTCCATATACATAGAGGAAAATATCCTTTTGGAATGTGATT	no	Remer et al., 2022
fABV	daC_Ao-a1D1	Crown	LipY764_contig367:4460	A	C	C	SNP	CCTGAGGATACTCAGAAAAATGTTCTGCCTTTAATGCTACCACACAAAACTGCAAGATTAATGTCCATTGCAGGATTAATGCATTTCAAATGAACTCATGTACTGACTTTTCTTAAGTTTCCCTTGAAAGGTGATAACATTGTTTGAAA[A/C]TCTTGTCAGAGCAAAATTTCCTCCATGTACTGAACGTTTCTCCCTAAAGTATGTTATTGTGCCCCTTATTTTAAGGTACAGACATCCATACAACAACTTATGAATTATTATCTAGAACTTTATGCAAATAAATTTGTAAGGGAAAGCCACG	no	Felkel et al., 2019
eASK	daC_Ao-a1H	Crown	LipY764_contig461:2601	A	C	C	SNP	ACAGGCACACAGCAGGGAAATGGACAAGGAAAGGTACAGTCATGGTATTGAATGGAGGGTTGAAGGATCAGAGCTTACAAAGAGCATCCAGATGGAGTAT[A/C]TGGGGAACGGTTTTTAAGCAGCGAGAAGTTGGCACACAAGGGGCAGGGCTGCTTCTGCAAATTGTCAGCATTTGGCAGAATTCTCGGATATATGTATACA	no	Bozlak et al., 2023
eASF	daC_Ao-a1P	Crown	LipY764_contig113:1958	T	G	G	SNP	GCCCTGAAGGAAGATTCTATTCTTGAAAGGTGTAGGGCACCAGATGTGACTTTGATGTTTCACTCAGAGTCTAACTTGCACTGGTCAGCTCTGCTCACC[T/G]GGCTGGTCCAGGGGTGTCCAGCATACAAACTACTACCTTTCATCAGGAAAATTCAGTGAATTGGAGAAGTTGTTTGACAGTGCTTCATTACCTTAATTTG	no	Bozlak et al., 2023
sAN	daC_Ao-aM	Crown	LipY764_contig464:3714	C	A	A	SNP	GTTTCAAGGTATATATATGGTAACATTTTTCTTTACTTTCTTAAGTAACAATGATAAAGTTTAGTCTTGACTGCAGTGTAGAAGCTTCTCGTCTTCTGAATCCATAGTCTATCTTAAAAAGTTCTCAATTTGGACATTTCAGGGCTTACG[C/A]TGAAAAAGAACACAAAGAGTTACTTTTAATGCTTACACTGTTTATGCAAATAACGCTTTATTTGAATTCATTCTTTTCTCTTTGTAAGAATTATTTTAGTCTATAATTAACACAGCATTTTGGCTATTCACGCTTGTACTCATGGTAAAT	no	Felkel et al., 2018
eWJ	daC_O	Crown	LipY764_contig374:4149	C	A	A	SNP	TGGAGAAGAAAGAGGATTTCTAGCAGGGGGTAAATGGTACACACCTGCAAGGAGAAATTTAAAAAATAGATACATGAAAGTCAATGGATGGATGCTATTCGGAGGGTAGGAAGATTAGAAAGAGACTGGGTTATGGAAAAATTGAGGAAAAAAAAACAAAACAGGAGAAATGGACCTTCCATTGATTAAGATGGTGATAT[C/A]AAGCCATGAACTGAGAAATAAATTCCACTAAAGGCTAAAAGTTTTAAAGCAAAAGAATACTTTATTTGCAGTCTATCATCTATCTATTCTATATAACATCTATCTATCTATCTATCTACCAATCATCTAGCATCTGTCTATATCTATCTACCTGTCTCTCTATCATTTATCTTATCTATCTAGATCAACAGATC…	no	Bozlak et al., 2023
eRE	daC_S	Crown	LipY764_contig219:1349	T	C	C	SNP	TTTTTTAAATTTATTATTTAAATAAGCTTTCGGCCCGTTTCTCTTTTTATACCCATTCTGACGCTCCCATAACACATATATTGTTTTTTGTTTTATAGTG[T/C]CCTATAAGCCATTTAGGCTTTCTTCACTCATTTTCATTCTTTCTTCTTTTTGTGGCTCTCACAGGATAGTTTCATTTTTTATTCTTGCTTGAGTCTAATG	no	Bozlak et al., 2023
fYR	daC_H	Crown	LipY764_contig312:3646	A	T	A	SNP	ACACATTAGCAAAAAACTGCTACTATTTACACAAACTCCAGATATGCCTTTGGAGTTTGTCATGTGGTTAGCACAATATGAAAATCCCATGGGTTCTTAAATTCTGTGGTATTACTTTGCTATTGGGCATATAATTGCTGCCTTATTAC[A/T]GTATATTCACTGAAAATGCTATTGTTCACTGCTCAGCTCGTGCAAGAGAAAACAACATTATTTTCTTGGGAGTGATAGGGCTGAAAAGGCTACTAAATACACAGCTAATAATGGACACCTCCCCTCCCCATCCCTTTTCCACTCAATTTAT	no	Felkel et al., 2019
sQB	daC_Hc	Crown	LipY764_contig9:14318	A	T	T	SNP	GGATATACTGCCTCTCCCAGAGATGGCCAGTTCTTCAAGATAGCAAAGGATTTGCCTGTCACCAGGCCTTTGATGTACAAACCAACCAATCCCAAGTCATTACACCCCATACCCCACTCTTTCTACCAGGCTCTTGCAGTCTAAGACACT[A/T]TCCTTTCCTGCCCTAAATCATTGTAGGGTTAGATACTGGCAGCTAGACATCACATCTATATCCCATTTTGATCAGGAAATGTACGTACTCCAGGTTTATTTTTTCCAA	no	Felkel et al., 2018
fSQ	daC_Hs	Crown	LipY764_contig49:30278	T	C	T	SNP	ATATGGTGAGTACAGTTGAGGAGAGTTCTTCGACAATACTGAGAGGCAGGTGTAAGCTTTGCAGGGTTTTGATAGTTGTTCTTTTTAAATGTGGTTATGTTGCAGCATATTTTATGTTAATGCCATGATACTGTAGAAGGAAATGCTGT[T/C]AGCTGAGAATAATATCAGTGGAGCATCATTCATGCACAGGTGAGGAAAGATTGAACCAGGTGTCCAAGCAAAGGGAGAGACTTTAGGAAAGAACAGAAGGAAAAACACATCTGTAGATGAAATCTAGAGAAGTCACACACAATATCTGAAG	no	Felkel et al., 2019
eAOL	daC_Hs-a	Crown	LipY764_contig91:6593	T	C	T	SNP	TTCCATGTCTCTCCTAGAATTCTCCATTTTTCTCCCACAATTGTCTCCTATGATTCTTTAATGTCCCTCACAACTCCCTCTCTCCCCAAATTCCCTTTCT[T/C]TCCCATAGTTCCTCATTCTCTCCAGAATTCCCATTCTTTCCTACAGTTCTGTCTCTCTCATATTCCTTTGTTTCCCCTATAATACTCTCTTCTCCTACAA	no	Bozlak et al., 2023
fABO	daC_Hs-b	Crown	LipY764_contig159:11818	G	A	A	SNP	TATCTCTATGCAGTGCGGCCCTCTTGTTTTATTTTTGTACGTTATGTCTATAAATGCCACAGTTCCAGCAATTATATTGTTGTAATATATAAACTATATGTAATAATACATTTTTATAATAGTAATTTATGTAATTTGTTGTCTTTTTA[G/A]ATAGGAAAAATTACATGTTTGGTTTTTGTTATGTTAGATTTTTAAATTCCCATTTCTTGTTCTCTTCACTTCTTCTTGTACGTTCAATTTGCCACCCGGAGTCATTTCTTTAGCCCAAGACAGCCTTGCTCTTACTTACTTCATTATGTAT	no	Felkel et al., 2019
rA	daC_T1	Crown	LipY764_contig54:27348	A	T	T	SNP	CTGACTGGTGGTGTCCAGTGTCCACCCGGCTGAACAACAGATAGATTGTCTCTGATTTCTAATAAGTGATTCTACACTTTATACAATCACTGTTATTCACGCCTGCAACCAACAGAAGTGTGCTTTCTAAACAGTAATCTCAAACTGTGA[A/T]TGTAGAACTCGAGAGTCATTCATGGAAGCCTAGCTCTGTTGCAAAGGCAGCACCTCTGGGTCCTGCTCTAGTTGTCCCAGGAGGTAATCTTGCTCTCTGCGAACAACTTAGGCCCTGCATCTTGGCTTTGCAACATGTGCTCTCAAGTAT	no	Wallner et al., 2013
eLH	daC_T1c	Crown	LipY764_contig119:8769	G	T	T	SNP	TGACCTCAAATACACAGCTGGATGTCCAGGTCTCAAAATCAATACACTGCTTTTTCTGTGTTGGAAATTTTCGTTAAAAACAAAAGCATTTTCTCTTTTTGAGCTCAAAGGTCCAAATGTCACTGTATAGGATAAGGTGAACTGAACTGAAATCCTGCCATTTCTCATAATAAAAATGCTAAAGAAATGTCTTTAGATAT[G/T]TAAATGTAAGAATAATTGTTTCTAACCGTGAAGGAATGTAGAATTATTTATGGTTTTGTGCACATTGCAAAAAGCACAAAATGTAGATTTACGTATAAAATACCCTCCTTGACTTAATTTAACTCACCATTGAACTATCCTTAATTGTTTATGCTTGCCCATTTATTTGTGGCTCTGTTACTCATTAAACTTTT…	no	Bozlak et al., 2023
eAUB	daC_T1m	Crown	LipY764_contig14:8319	G	A	A	SNP	GTAGTCATTGCACATCACTTTGGCAGGCGAAAACAAGTTTGTTTCCAGGATACTCTCCCACTATCCACCATTCTGCATTTAGAGGATGCCTCTAATAAAT[G/A]AATTACACATTAGCATGCCTGCTTATTCCAAATGTCTGTACATCCTCTTTCTTCTGCCCAAAGAAATCTTGCTAATTCTTCACCAGCCAGGCTATGCCAC	no	Bozlak et al., 2023
qBV	daC_T2	Crown	LipY764_contig61:2024	T	G	G	SNP	GCAAAGATAATATTTTCAATATATGTTGCTGAAAGAATTGAGCATCCACATGCAAACAATAAATCTAGACCCAGGTCTTATATCTTTCACTAAAATTAAC[T/G]AATAAATAGATTATAGACTTAAATATAAATCTCTAAATGATAAAACTGCTATAAGATATGACATAGAAGAAAATGTAGATCAAGTTGTGTATGACACTAA	no	Remer et al., 2022
eGK	daC_T2r	Crown	LipY764_contig64:14270	C	T	T	SNP	GTGAAAACCTGTAGGGTTTTATCGAATAGGTCTTTGGCTCATAAATATGCAGAAAGATGCTTCTTTTCAGCATGTGGGAATCAGAAGCTGATATTCAAGTCAGGGTGTCTGTTAGGACTAAACATACCACCCACTTGTCTTGTCAGGGGAGTGGTACCTTGGGACCAACTGCCACAACAAAACCGACTTTTGTCACCACC[C/T]TTTAAGCCACAGCTTCGATTATTTCCATGGGCTCCCTGTGACCACCCTGAGAGATTGCAAGCCCGGAGAAGGCACCGTGTTCACCACAGGCATCAGGGCGCTGGTCTCTGTCCCTCTTCAGCTCATCGCCATCGCTCTCCTGACCCTGGCGGTGCTGAAGCGCCTGAGGCTTCTCCCTTCACCAGGCCTTGTCT…	no	Bozlak et al., 2023
qEL	daC_T2k	Crown	LipY764_contig293:9913	A	G	G	SNP	CTCAAAGGCTATTTCTGAAATTCATATAGAAAAGTAAAAATAGCGTTATCTAAAACTGCAGATTTTCTATACATACAATTGCAACGCGTTATATGATCTTCTCTACCTTTGTCTTTTTCTATTTTAAATATTTGTCTTCTTAGATTATC[A/G]CTGTAGAACGGTGTCATTGTTTTAGTATATTCACAATATTTCACTGAGTGGGTGAACCATAATTTATTTAGTGTTGTCTGTTGGTGAGCATTCAAATTATTTTAAGGTTTTAATCATGTAAATAGTGCTTCCCATTATTATACTGTGTGAT	no	Remer et al., 2022
fVZ	daC_T3	Crown	LipY764_contig169:2523	G	C	C	SNP	TCTCCAATGAAAAGGTGAAGGCCATTTTGCCCAGTCTCCATCTCCTATTCTGTGGAGTTGGTCTGAAAATATCCTGAAGCTTGGAAGTCATTTCCTGGATCCTTCCATTCTTTATACTTGGGAACTAGTCAACAGGCTAGTTGGGACAG[G/C]TGATTATCTGGACAACTCTGCTATCTGAGCAATGTGAATTCTCAGATAAGTCCTTTCTCAAGAGCTCCTAGCCATCCAATTCAAATTCATCCCAATTGGGTATCTACTTTAGTGAGAGATTTCTAATGATAGCAAGTCCTTCCCGCTAAAC	no	Felkel et al., 2019
fZS	daC_T3u	Crown	LipY764_contig407:1649	T	C	C	SNP	TCGTCACTTACAAAGTTAGTTTTACGTTCTCCTCTCCAATTTGGATGCCTGAATTTCTTTTTCCTTTGTAATTGCTCTAGCCAAGACTAACAATACAGTGTTGAATAGCAGTGGTGAAAATGGGCATCAGTGTATTGCTCCTGTCCTTAGGGGAAAATATTCAGTCTTTGACCATTGAAAGCAACGCTAGCTGTGAATTG[T/C]TAATAAATGCTTAGTATTATATTAGGGAAGTTGCTTTCTGTTTCCAGCTTTGTGTGCATTTGTTGTAATGCAAGAGGGTTAAACTTTTTGATTTTTTTTCTGCATTTATTGAGACAGTCATGTATTCTTTTTCTTCATTCTGTTAATACGGTGTGTTCTATTGACTGAGTTTTTTCATTTGGTTTTGTTTTGTT…	no	Felkel et al., 2019
sPZ	daC_T3a	Crown	LipY764_contig4:39228	T	A	A	SNP	TAGTCCATCAGGCAGTTCTAGAATCTGCTGTGGGGGCACTTGGGCCCTTTATTTCATGCTATGACTCCCTGAGTTTCATATGGGGCCATCTGGCATGTTGACTGGATCCCCTGAGGTGAGTGGGTCCTCTGAGGTTTGTCAGAGTCCTCG[T/A]GTGCTTAGTGTAGGCCCACTAATATATTGTTTGGAGATACCTGACCTGAGTCTGGTGTCTGTGCTTAGGTTGTCTCCTTAGGTGGTACTGGGATCCCCTGAGGGTCTTGAGCCTCTTCGTTTGGGACTGGAAATCCGTAAGATTGGTCTG	no	Felkel et al., 2018
eAUO	daC_T3i	Crown	LipY764_contig265:4250	G	A	A	SNP	TAAACATTTCTTTCCTCAGGAACCAGTTCTAAGTTTTCTTAAGAAATATTGGATAGACTCCACAGGGCAGTAGGGAGTTATTTAAATCAAATTCTCTCCC[G/A]GAAGTAACACATTGGGTAATTCTAGTTACTCACATATGCTTTCTTCTACAATAAAGCACCTTCAAAGGTTATCATGGCTATGTTGTACTGTTATATCCAT	no	Bozlak et al., 2023
rB	daC_Tb	Crown	LipY764_contig233:6238	C	G	G	SNP	AACCATGATGGTAAAAAATTTTAGTAATATTACGTTTGAAGTTATGAGCAGTTTTGTGTTGACATAAACCCTAATATGGAGATACCCAGAACAATAAATCATCTAGCATTTAATTCTTAAGAAAAACAATATATTAAACAAATGGTAATT[C/G]TTATAAAAGTTTCTTCTGTATATGTACTTTGTGATAGTGATGTCCTACACAGTAAAAATGATACATCCTATAAGATTTCTTTCAGATCTCATTCAATTGTTATTGATGTAAAAAGTGCTTGTTTAGCAAAAGATAAAGGTTAAATATTTA	no	Wallner et al., 2017
eAVI	daC_Tb-k	Crown	LipY764_contig13:2602	G	T	T	SNP	GTGTACTGGACCCTGGATACTGCCATTGAGACAAAATTGGACACTTTTGTTTGAAATGTGCCCTGCTTTCAGACAAATCAACTTAAACTTTGATTTTTTG[G/T]CTACAACATCCACTGTGCTCAAACAAAACAGAAGTTTCAAATTATACAACCACGGAATTATTCCCTATGAAGAAGAAAATGTAAGGCATTTCTTTAAAGC	no	Bozlak et al., 2023
fAAC	daC_Tb1	Crown	LipY764_contig468:3932	A	T	T	SNP	AAGGCGTTCATATGCCAACAGACGATATCCACACAACATAAAGAAATCTGAAAGACCCATACTGTCACACATTGGTGGGTGGAGAGGTTGGAGCACCCCTTGGAGGAGGTGGAATGGGGTCAAAGAAAACTTTGCTCCCTCTCCAAAAG[A/T]TTGCAATCCGAGACTGCACGCAGTCTCCAAGGGGAAAAGAAAGGAGAGGGGATTCATTCATGGGAACATCAGAGATCCCTGAGGTCCTTCACAGCCAGGGGGAAACTGTCTACCAAGGTCAAAGCTAACCCAGGGGTGAACTCATCAAACC	yes, FAM	Felkel et al., 2019
eAVK	daC_Tb1-a	Crown	LipY764_contig98:4555	T	C	C	SNP	GGTGATCTGAGCTACAGTCGTTCACTCAAAAATGGGGTTGACACAGGAGGCTGCCCCCAAAATAGTCAGACTTCTTCACTGAAGTTCTGGGTCTGCTCCA[T/C]CAAGTAGAGAAGACATGGCATCATGCATTTATGACCTTTATGGTGAGAGATGGTACCCAGATTTCCTCTGAAACCCACCTGACTTATTTCAGTACCTGTA	no	Bozlak et al., 2023
eAVO	daC_Tb1-aK	Crown	LipY764_contig17:2111	A	G	G	SNP	AACTGTTGTGATTTGGTTAACCCTAAACCTAACCCTTATTCTCTCCCTGATCCCATCCTTCCTCCATGTCACTTCCTGGCCCCACCTCTCCTTCTGTGTC[A/G]CTTTCTAGCCCCACCTCTCCTTCTACGTCACTTCCTGCCCCACCCTACCCCTCCTTCTATGTCACTTCCTGGCCTCACTTTCCTTTATGATGTCACTTCG	no	Bozlak et al., 2023
eAVL	daC_Tb1-aB	Crown	LipY764_contig100:1563	C	A	A	SNP	TGTTGGACTGAAAATAGGTTGATCAGGGCAGGTCTCTTTGAAAATGTGGTGTTTGAGCAGAGAATTCAGAAAAGGTAAGAAATTTGAGTATGGTTCTATG[C/A]AGGGGGAGGGGCTGATATTTCAGGGAAAAGTATTAGTTCAGGCAAAGACCAGAGATGCATACCCTCCAGGCATTTGAGCCTAGCTTGGAGGTCAATATGG	yes, FAM	Bozlak et al., 2023
rC	daC_Tb-d	Crown	LipY764_contig213:4369	T	C	C	SNP	TCAATTTTGGGAAGCTGGCAGCAGGTTCATTCAACATTTATTGAAGTGGTTGATTACTTTCTTCTTCGTGAATAAAATACCTTGAGCTAATTTGAAGTGTCAAAGTTGTATCTCTCAGCACCATGGCAGTTGAAGAGATATGGATAATGC[T/C]AGGGAAGGGATTACAGGGCTTGACTCATGCATGTTTTGACAGATCTTTTTACTTTTTCTTTTCCAGTATCTGTTTAGGCAAAATAAAAAGAAAA	no	Wallner et al., 2017
rG	daC_Tb-dM	Crown	LipY764_contig146:3345	T	C	C	SNP	AGGTCTTAGTATTAAACTTCCACACAATCAGAAAACAGAACATTTTTATCCCTA[T/C]GTATGTACAGATGAAAATAAGGGTCAATCTTGTGGGCAGTTATGTCCGTATCTCTGGAGACAGACTGCCAGACTTTAAACAACACTCAATAGAGAGAATGCAACAAAACTAATGTCCTGCCATAATTTTCCGGTTCCCCATAACCTATAT	no	Wallner et al., 2017
fWM	daC_Tb-dW	Crown	LipY764_contig5:42484	T	C	C	SNP	GGGACAGAGTTGTTCCCGTGGCAACTAAGAAGACCTACTCTAATAATATTATCACAGCAAGGTATCCACATTAATTTGCAGCATTTTATCCACTGAGCCCAGCAAGTGAGATGAGACTCACGATTTTCTAATTAATAACAAATTACAAG[T/C]ACAGTATTGAGAATTTTTAAATGACACTGAAACCATTCATGGTGTTTTTCTGTTGCTCCCTTGGTAATTGTCTAAGTGTAGCTGATTGAGGTAAATTAAATGGTGGACATGCCCTAGTAAAGAGAATTGAGGTGTATTCTCCCTTTTCATC	no	Felkel et al., 2019
rD	daC_Tb-dW1	Crown	LipY764_contig386:5920	TA	T	T	Indel	TCCCTAATCCATTTCAGTAACTTCCCTCTGCTGAGCATCTAGGATTCCAGAAATGAAATCTGGGTCCAAGATAAGTCTTTTGAAACATGTTGCCAAACTACTCACCAGAAAAGCTGTCAGATTCGTAGTCTAATCAGCATTAGAACAAGT[T/-]AAGTGCTTATTTCTCACAGTCTCACCCACAATGGGCACTGCTCTTCTATTAGATCTCTGTCAACTTGACAGTAAAACCTAGTGTCTCACTTTTAAACTTGTAGGTCCTAGTTAAACTCTTTTTATATGCTTGTTTCCTATATGTACTTCT	no	Wallner et al., 2013
qGH	daC_Tb-dW2	Crown	LipY764_contig84:9378	G	A	A	SNP	ATTAAAACAAAACTCTACATCTCACTGCAGATTGTAAGCATAGGTATTTCTTAGCCACATGATAAGAGCACACAAAACAAAGTACTTACATTTACTACTGTTCTCATATCACTAAATTCTGCAAGAAATAAAGATATCATCCTTCTGTGT[G/A]TGGATCACGGACTGCTTGCAAGTGGTTCTTCTCCCCCGCTCAAGATAACACACTTTCCATGCCAATGATTCTGAATGATGTTGGAAGGGATTCCTTTAACTGTAGCACCCCCACAGCAGCCTTTTAGTTCAGAACTTCCAGTCGTCAAAG	no	Remer et al., 2022
qBX	daC_Tb-dW3	Crown	LipY764_contig68:9050	A	T	T	SNP	GGTTCTCCTGCTCTCCTTTAACCCATAGGAGAAGGTCATGACTCAGAGGATCCCTCTTTGCACTGAGCTGTACCAGACTAGAAATGTAGTGAGCAGCTAATTTCCTTCCTGTGCTTTTTCTATGTGGCCAATCTTGGTTTTTGTACTCC[A/T]CTGGGTTGCTACAGCTTCTTCATTGCATCCCAGAGCTCTCTTGGAGCTATTTATATTCGTGGGTAGTTTTTAAATCTTTTTTGGAGGGCTGAGAATTGTCCTTTTAGCTGGTTATCTTGTAGACCTCAGCCCTTTCAGTAATTACTTTTAA	no	Remer et al., 2022
sP	daC_Tb-dW4	Crown	LipY764_contig155:6894	A	C	C	SNP	AATAAATGGGCAAATGCTTTTATCTCGACAGCAATCCATCATTGGTCAAGGTCCACCACTTCAGGGATGAGCAAACTTGAGGATAGATAATGCCCTGAAATCTAAGTCCATTCTCAGAAAGGGATGAAGCTGGAAGAAGTCAGCAGGCAA[A/C]ATTTTTAGCAGATGAGAAATAAGTATGTCACTCTGAAGATGGGATTAGATAGGATTGTCACAGTCTCTAGCACGAATTGATAATTGCTCTTACATGTCAAGGTCTCCCAAGTTGAGATTTTTCCTTAATAAACCTCATTAAGAATCACTT	no	Felkel et al., 2018
fWU	daC_Tb-o	Crown	LipY764_contig198:17295	T	A	A	SNP	TGGCACTGACTTTCAGTATGCAGTACTGCCATAAACCTTCAGTTAGTACAAAATGCACTATCTGGGAAATGCAATAAAGCAAAGTGCAATAAAATGATGTATGCCTGTATCTGATAAGGGGTTAATATCTAAAACATAAAAAGAACTCA[T/A]ACAACTTAATAGGAAAACCCAAAATCTGATAAAAAATGGGTGGAAGACCTGAAGAGACATTTTCCCAAAGAAGAATGGCCATATAGATGAATGGTTCATACAGATAACCAGCAAGGACATGAAAAGGTGATCAACATTATTAGTCATCAAG	no	Felkel et al., 2019
rN	daC_Tb-oL	Crown	LipY764_contig76:5598	C	T	T	SNP	ACTCATTTGCAGTCAATCCCCATTTTCCCCTTTCCCAGCCCTTGGCAATCACTATTTTTTCTCTAGACAGATTTGCATATTCTGGACATTTCATTTAAATGAAATGATACAGGAGGTGATTTTATGACTGACAGATTTTTTTTAAACTAT[C/T]TTTAAGGAGGTTTGTACAAGAAACAGCCATTGACGATAAAGACAATATGTCCTTCAGGGGAAGAGGTTGGGCAGGTTTAAAACACCAAGATTTCCTAAATTCAGGATTTCTCAGCTGTGATGCAAATCCACTGTATGCACAGCATCTACT	no	Wallner et al., 2017
eAUS	daC_Tb-oH	Crown	LipY764_contig133:14107	T	A	A	SNP	AATAGACAATCTTCCAACTCCCAAAAGTTGGTAGAAATGTTAGAGACAGATGTCAACTGCATGCATACACTTCCCTGGGCTGGAGTGGACATGATACAAG[T/A]TTGCATCTTCCTGGCTTGGCTTAGAAAGCCACCACTGGTCCAATGCTCCTCAGCCTCCCACGGTCATTTTCATTCCCTTACATCCCCGGAGCCTCTCTTG	no	Bozlak et al., 2023
fUJ	daC_Tb-oB	Crown	LipY764_contig99:20419	T	C	C	SNP	CCTCAGTCTGTCCTGCAGCTCAATGACTTCCAATCTGTAATCCCTGGTTCCTCAAGATTCTGCAAGGGAAGGAATGGGAGACCTTGAGCCCTTCAATGACCAGCCACCCAAAAGATAGTTGTCCTTTTCTCTTGGGGTGTTTCTTTGTG[T/C]CTCTTCCTCATGTCCCTCTCCTTCCATGCAGTTCTAAAATGTCACTGTCCCTAGAATTCTGCCTGAAGCCCAGCAATGACTCTCCCCATAATTTTTAACCACCTTCTCTGTGGTAATCTCTGAGAAATGAAGGGAGACCCCACAAGGACCA	no	Felkel et al., 2019
fBVB	daC_Tb-oB1	Crown	LipY764_contig155:11568	(GATA)14-length 204	(GATA)15-length 208	(GATA)15-length 208	STR	GTGCTATATCATCTCATATAGCAAGGTTGATAATCGAATGCCAAGGTGTTGAGGAGAGGTGATGAAATGAAAAGCTGGAAGAGGTATCTGCACTCCTATGTTAACTGCAGCATTATTCACAATAGCCAAGATATGGAAACAACCTAAGTGTCTGTGAATGAATTAATGGATTTAAAAAATGAGAGGCAGATAGATGGATGCAAGATAGATTGACGAAAGATATAGATG[GATA]GATAGATAGATAGATAGATAGATAGATAGATAGATAGATAGATAGATAGATAGATAAACAGACAGGCAGATAGATAGATAGACAGATAGATACACACGCAGTGGAATATTATTGGGTATTCAAAAGAAGGAAATCTTGCCATTTCTGACAACATGGATGCACCTG…	no	Felkel et al., 2019
rQ	daC_Tb-oB1a	Crown	LipY764_contig245:2330	T	C	C	SNP	TACATGAGATTACATAGCAAAGATTAGTCAAAATGCTTTGCAGGATAAGTCCTTTACTCCTTAATCATCATTTTAATTCTCAACTAGTATTTTTGTTTGTATTTCACTGAAAAACTGAGAATAATTCATTCTTATTGTTTTAGCACAGTT[T/C]ATGCATCCATCCACGTCTGTGCAATGTATTCTTCCTTTCAAATTCTTTTGTGGAAGAGCTCTTCTCACTCAAGTTTAGTGGTTCTCGACTAGGAGTGGGTTGTATTTCATCTTAAGGACATTTGGCAATAGCTGGAGACATATTTAGTTG	no	Wallner et al., 2017
rO	daC_Tb-oB1b	Crown	LipY764_contig10:3227	C	T	T	SNP	TTATTTTAAAGGTACCCATGGAGAAGGCAGCCTCCAGACGTTCACTCTCTTATGCAAGACCATGAAGACAGTAGCTGGCTCATCATCTAACATAAATACAAATTCTTGGGCCTTATGTGATCCTAGAGCGCAATACAATTCCAGACACTA[C/T]AAACAATAGCATCTATTATGATAAACTCCACAAATAGGCACAGTGTCTCCTAGAAATGTTTACCTTCTGGAGATAACACATACTATTAATCATTCTCCTCCAGATAAGACATATTATGTCACTAGAAAGTCAAATGCTTTCCCGCGGGGA	no	Wallner et al., 2017
fWB	daC_Tb-oB1c	Crown	LipY764_contig169:6045	C	T	T	SNP	GGAGTCTTCCAAAACAAATATTTTACTTTCGGCTATTAACAATATTGTCAATTGTTAAGCCTCATTTTGATCAAGAGATGGTTAATGAGTATTTTATCCTTGCTCTATTTGCTGCATTATATTCTTCTAGATGTGGGATTTAAAAATGC[C/T]GTGAGACAGGGAACTCAATTTGTGGATAATCTTAAAATATACAGTAGCAAAATTTAAGCAAATGCTGTCTTCTAATATCTTCTAAAGATCCCCAAATCATGGATGAACATATATTTTTGAGTTCAGATCACTGAAGTCAGAGCAATTCCAA	no	Felkel et al., 2019
eAUV	daC_Tb-oB1d	Crown	LipY764_contig179:14724	G	T	T	SNP	AATATATCTTTTAAGTAAAGAAGGTATAAAGAGAAGAGATATTTTTGGTTTGTTTTGTGAAGATAAATTTGTCCGAATGCACTAGGAAAGGAAATATGGG[G/T]AAAATTCTGAACATAAAAAGTGACAGAAGGTGTGTGGAAGTAAAACCTTGAGGAATTTTGTGCATGGTCCAATTGGCTGATATTAAAATGAATTCAGTTA	no	Bozlak et al., 2023
rP	daC_Tb-oB2	Crown	LipY764_contig46:10000	A	C	C	SNP	ACTTGAACAATGTAGGGTTCAATTAGAGCAACTTCAAATTTGTGATTTTCCATTCACCGATAAATTGCGAGCAGGGACAAATTTATCATCAAGCTATGTAAGACACCACTTTCTTTTTGCACAGGAAAAACATCCCCCAAAACAAACAAA[A/C]AAAAAAGGCGGCGATGTTAAAACCAATAGAAACACAATAGTTTTAGATGACTGATCTGAAAAACCTATGAGCTAAATTTGATTATGGGAAGCTGCCGTATACATAAAGAATGGTACGAACACTTCATTAAC	no	Wallner et al., 2017
fQI	daC_Tb-oB3	Crown	LipY764_contig94:19794	G	C	C	SNP	AACTGATGAAATCCTGGGCCACCAAAGTGAAGCGTGCAAACTTAACCACTCTGCTATGGGGCTGGCCCATGTTTTTTTTTTTTTTACCTTCTACTGTGGCTACTAGAAAAGTGTAAATTACATTTGTGGCTCACATTCTATCTCCATGA[G/C]ACAGTGTGAATCTAGACAGCTTCTATGGTACCTGTAGGCTCTAAATTTGTTGACTGCAGTCGGCAACACGAAGGCAGAGAGTTTTTTTAGGTTACATGATTTCTTTTTGAACTGTGCCCACTGCAGATTTTTAATTATATGCCCACAAAAT	no	Felkel et al., 2019
qFM	daC_Tb-oB4	Crown	LipY764_contig539:1417	TTAATGGAGC	T	T	Indel	AAATGCTCCTTGACAAAAATGTATAAACAAATTCATTTTGCATAGACTCAATGACTCACTAAAAATAGTACTTTCAAAACTGTAGATTCCTGACAAAGGCACATTTCTGGTAGCTCACACATTCAGTCAAAGGAGACATTCTTAAATAAT[TAATGGAGC/-]AAACGATATCTTGAATCATCATTATTTAGAATGCACTAAGATAGTGTGCCTTGCAATGAAAACACACTGATGAAGAAAATTTATTTTCCCTGCCTTTATGTGGTTTAAAATAGATTGGAGGCATGTTGTTAATTCAAGTAGA	no	Remer et al., 2022
eAVE	daC_Tb-oB5	Crown	LipY764_contig569:2252	T	G	G	SNP	ATTTAGGTGTGTCTGTGTAGTAATACCTGCTAAAGATTTTCCTCCGTGTCACAAGGGAAACTGAAAAGATGGAAAGGCGAGGATATCTCTGGCTTTCAAA[T/G]GAATTTGGGATTCAGGTCTTCTGAAAACTTCACTTGAAAGATTAGGGAAAAAAACCCAGCAGTAGAAAGTATGCCTCTTGTGGCATTTAGGAGACAACAT	no	Bozlak et al., 2023
