# Supplementary material for: Mitochondrial DNA and Y chromosome reveal the genetic structure of the native Polish Konik horse population
Source: PeerJ. 2024 Jun 20;12:e17549. doi: 10.7717/peerj.17549 (PMC11193968; doi:10.7717/peerj.17549)
Supplement: Supplemental Information 2 — Sample identifiers are denoted in the first column with the corresponding stallion line. Information on the most terminal variant with derived state and haplotypes are given accordingly for each sample. Allelic states of haplotype-determining variants (Variant ID and [Reference/Alternative]) that were tested in the laboratory are given in red, where gray-colored allelic states indicate imputed information. [file peerj-12-17549-s002.xlsx]

## Sheet: S3.MSY HT spectra 
			Variant ID [REF/ALT]	fFQ [G/T]	fBF [A/G]	sCO [A/C]	sES [T/G]	rBA [T/C]	eTC [G/A]	eAJB [C/T]	eKZ [A/C]	eAJP [G/A]	eEB [A/C]	rBG [CT/CTT]	eLL [A/G]	sAA [G/C]	rBF [A/G]	rAW [A/G]	eALC [G/A]	eDC [G/A]	sAZ [C/T]	eNG [C/A]	sQ [T/C]	rAY [T/C]	eWP [G/A]	rAX [C/T]	rW [G/A]	eAPK [T/G]	rAF [G/A]	eLF [G/A]	eARE [G/C]	rOR [G/A]	rAE [C/G]	fWP [C/T]	qAA [C/A]	eAPS [CA/C]	fTA [A/C]	fXA [C/T]	eAPN [A/G]	rDT [T/C]	eAPU [A/G]	eAPT [T/C]	eBZ [C/T]	eAPX [A/T]	fSA [G/A]	qH [A/G]	qCU [T/A]	qCI [G/A]	fTT [G/C]
Sample ID	Stallion_line	Most terminal variant derived genotyped	Haplotype	p	d	db	da1	da1_N	da1_G	da1_R	da1_Z	da1_S	da1_U	da2	da2_L	da2_M	da3	da3_I	da3_D	da3_K	da3_J	da3_T	da3_Y	da4	da4_E	daC	daC_A	daC_Ak	daC_Ad	daC_Ad-m	daC_Ad-s	daC_Ad-h	daC_Ad-hA	daC_Ad-hA1	daC_Ad-hA1a	daC_Ad-hA2	daC_Ad-hB	daC_Ad-hC	daC_Ad-hR	daC_Ad-b	daC_Ad-bF	daC_Ad-bS	daC_Ad-bM	daC_Ad-bP	daC_Ad-bA	daC_Ad-bN	daC_Am	daC_Am-a	daC_Am-s
O1	Chochlik	rOR_1	daC_Ad-h*	G	A	A	T	T	G	C	A	G	A	CT	A	G	A	A	G	G	C	C	T	T	G	C	A	T	A	G	G	A	G	C	C	CA	A	C	A	T	A	T	C	A	G	A	T	G	G
O2	Chochlik	rOR_1	daC_Ad-h*	G	A	A	T	T	G	C	A	G	A	CT	A	G	A	A	G	G	C	C	T	T	G	C	A	T	A	G	G	A	G	C	C	CA	A	C	A	T	A	T	C	A	G	A	T	G	G
O3	Chochlik	rOR_1	daC_Ad-h*	G	A	A	T	T	G	C	A	G	A	CT	A	G	A	A	G	G	C	C	T	T	G	C	A	T	A	G	G	A	G	C	C	CA	A	C	A	T	A	T	C	A	G	A	T	G	G
O4	Chochlik	rOR_1	daC_Ad-h*	G	A	A	T	T	G	C	A	G	A	CT	A	G	A	A	G	G	C	C	T	T	G	C	A	T	A	G	G	A	G	C	C	CA	A	C	A	T	A	T	C	A	G	A	T	G	G
O5	Chochlik	rOR_1	daC_Ad-h*	G	A	A	T	T	G	C	A	G	A	CT	A	G	A	A	G	G	C	C	T	T	G	C	A	T	A	G	G	A	G	C	C	CA	A	C	A	T	A	T	C	A	G	A	T	G	G
O6	Chochlik	rOR_1	daC_Ad-h*	G	A	A	T	T	G	C	A	G	A	CT	A	G	A	A	G	G	C	C	T	T	G	C	A	T	A	G	G	A	G	C	C	CA	A	C	A	T	A	T	C	A	G	A	T	G	G
O7	Gejt I	rOR_1	daC_Ad-h*	G	A	A	T	T	G	C	A	G	A	CT	A	G	A	A	G	G	C	C	T	T	G	C	A	T	A	G	G	A	G	C	C	CA	A	C	A	T	A	T	C	A	G	A	T	G	G
O8	Gejt I	rOR_1	daC_Ad-h*	G	A	A	T	T	G	C	A	G	A	CT	A	G	A	A	G	G	C	C	T	T	G	C	A	T	A	G	G	A	G	C	C	CA	A	C	A	T	A	T	C	A	G	A	T	G	G
O9	Gejt I	rOR_1	daC_Ad-h*	G	A	A	T	T	G	C	A	G	A	CT	A	G	A	A	G	G	C	C	T	T	G	C	A	T	A	G	G	A	G	C	C	CA	A	C	A	T	A	T	C	A	G	A	T	G	G
O10	Gejt I	rOR_1	daC_Ad-h*	G	A	A	T	T	G	C	A	G	A	CT	A	G	A	A	G	G	C	C	T	T	G	C	A	T	A	G	G	A	G	C	C	CA	A	C	A	T	A	T	C	A	G	A	T	G	G
O11	Gejt I	fBVB_1	daC_Tb-oB1*	G	A	A	T	T	G	C	A	G	A	CT	A	G	A	A	G	G	C	C	T	T	G	C	G	T	G	G	G	G	C	C	C	CA	A	C	A	T	A	T	C	A	G	A	T	G	G
O12	Gejt I	fBVB_1	daC_Tb-oB1*	G	A	A	T	T	G	C	A	G	A	CT	A	G	A	A	G	G	C	C	T	T	G	C	G	T	G	G	G	G	C	C	C	CA	A	C	A	T	A	T	C	A	G	A	T	G	G
O13	Goraj	fWP_1	daC_Ad-hA1*	G	A	A	T	T	G	C	A	G	A	CT	A	G	A	A	G	G	C	C	T	T	G	C	A	T	A	G	G	A	C	T	C	CA	A	C	A	T	A	T	C	A	G	A	T	G	G
O14	Goraj	fWP_1	daC_Ad-hA1*	G	A	A	T	T	G	C	A	G	A	CT	A	G	A	A	G	G	C	C	T	T	G	C	A	T	A	G	G	A	C	T	C	CA	A	C	A	T	A	T	C	A	G	A	T	G	G
O15	Goraj	fWP_1	daC_Ad-hA1*	G	A	A	T	T	G	C	A	G	A	CT	A	G	A	A	G	G	C	C	T	T	G	C	A	T	A	G	G	A	C	T	C	CA	A	C	A	T	A	T	C	A	G	A	T	G	G
O16	Goraj	fWP_1	daC_Ad-hA1*	G	A	A	T	T	G	C	A	G	A	CT	A	G	A	A	G	G	C	C	T	T	G	C	A	T	A	G	G	A	C	T	C	CA	A	C	A	T	A	T	C	A	G	A	T	G	G
O17	Goraj	fWP_1	daC_Ad-hA1*	G	A	A	T	T	G	C	A	G	A	CT	A	G	A	A	G	G	C	C	T	T	G	C	A	T	A	G	G	A	C	T	C	CA	A	C	A	T	A	T	C	A	G	A	T	G	G
O18	Goraj	fWP_1	daC_Ad-hA1*	G	A	A	T	T	G	C	A	G	A	CT	A	G	A	A	G	G	C	C	T	T	G	C	A	T	A	G	G	A	C	T	C	CA	A	C	A	T	A	T	C	A	G	A	T	G	G
O19	Liliput	fWP_1	daC_Ad-hA1*	G	A	A	T	T	G	C	A	G	A	CT	A	G	A	A	G	G	C	C	T	T	G	C	A	T	A	G	G	A	C	T	C	CA	A	C	A	T	A	T	C	A	G	A	T	G	G
O20	Liliput	fWP_1	daC_Ad-hA1*	G	A	A	T	T	G	C	A	G	A	CT	A	G	A	A	G	G	C	C	T	T	G	C	A	T	A	G	G	A	C	T	C	CA	A	C	A	T	A	T	C	A	G	A	T	G	G
O21	Liliput	fWP_1	daC_Ad-hA1*	G	A	A	T	T	G	C	A	G	A	CT	A	G	A	A	G	G	C	C	T	T	G	C	A	T	A	G	G	A	C	T	C	CA	A	C	A	T	A	T	C	A	G	A	T	G	G
O22	Liliput	fWP_1	daC_Ad-hA1*	G	A	A	T	T	G	C	A	G	A	CT	A	G	A	A	G	G	C	C	T	T	G	C	A	T	A	G	G	A	C	T	C	CA	A	C	A	T	A	T	C	A	G	A	T	G	G
O23	Liliput	fWP_1	daC_Ad-hA1*	G	A	A	T	T	G	C	A	G	A	CT	A	G	A	A	G	G	C	C	T	T	G	C	A	T	A	G	G	A	C	T	C	CA	A	C	A	T	A	T	C	A	G	A	T	G	G
O24	Liliput	fWP_1	daC_Ad-hA1*	G	A	A	T	T	G	C	A	G	A	CT	A	G	A	A	G	G	C	C	T	T	G	C	A	T	A	G	G	A	C	T	C	CA	A	C	A	T	A	T	C	A	G	A	T	G	G
O25	Myszak	rOR_1	daC_Ad-h*	G	A	A	T	T	G	C	A	G	A	CT	A	G	A	A	G	G	C	C	T	T	G	C	A	T	A	G	G	A	G	C	C	CA	A	C	A	T	A	T	C	A	G	A	T	G	G
O26	Myszak	rOR_1	daC_Ad-h*	G	A	A	T	T	G	C	A	G	A	CT	A	G	A	A	G	G	C	C	T	T	G	C	A	T	A	G	G	A	G	C	C	CA	A	C	A	T	A	T	C	A	G	A	T	G	G
O27	Myszak	rOR_1	daC_Ad-h*	G	A	A	T	T	G	C	A	G	A	CT	A	G	A	A	G	G	C	C	T	T	G	C	A	T	A	G	G	A	G	C	C	CA	A	C	A	T	A	T	C	A	G	A	T	G	G
O28	Myszak	rOR_1	daC_Ad-h*	G	A	A	T	T	G	C	A	G	A	CT	A	G	A	A	G	G	C	C	T	T	G	C	A	T	A	G	G	A	G	C	C	CA	A	C	A	T	A	T	C	A	G	A	T	G	G
O29	Myszak	rOR_1	daC_Ad-h*	G	A	A	T	T	G	C	A	G	A	CT	A	G	A	A	G	G	C	C	T	T	G	C	A	T	A	G	G	A	G	C	C	CA	A	C	A	T	A	T	C	A	G	A	T	G	G
O30	Myszak	rOR_1	daC_Ad-h*	G	A	A	T	T	G	C	A	G	A	CT	A	G	A	A	G	G	C	C	T	T	G	C	A	T	A	G	G	A	G	C	C	CA	A	C	A	T	A	T	C	A	G	A	T	G	G
O31	Wicek	fABV_1	daC_Ao-a1D1	G	A	A	T	T	G	C	A	G	A	CT	A	G	A	A	G	G	C	C	T	T	G	C	A	T	G	G	G	G	C	C	C	CA	A	C	A	T	A	T	C	A	G	A	T	G	G
O32	Wicek	fABV_1	daC_Ao-a1D1	G	A	A	T	T	G	C	A	G	A	CT	A	G	A	A	G	G	C	C	T	T	G	C	A	T	G	G	G	G	C	C	C	CA	A	C	A	T	A	T	C	A	G	A	T	G	G
O33	Wicek	fABV_1	daC_Ao-a1D1	G	A	A	T	T	G	C	A	G	A	CT	A	G	A	A	G	G	C	C	T	T	G	C	A	T	G	G	G	G	C	C	C	CA	A	C	A	T	A	T	C	A	G	A	T	G	G
O34	Wicek	fABV_1	daC_Ao-a1D1	G	A	A	T	T	G	C	A	G	A	CT	A	G	A	A	G	G	C	C	T	T	G	C	A	T	G	G	G	G	C	C	C	CA	A	C	A	T	A	T	C	A	G	A	T	G	G
O35	Wicek	fABV_1	daC_Ao-a1D1	G	A	A	T	T	G	C	A	G	A	CT	A	G	A	A	G	G	C	C	T	T	G	C	A	T	G	G	G	G	C	C	C	CA	A	C	A	T	A	T	C	A	G	A	T	G	G
O36	Wicek	fABV_1	daC_Ao-a1D1	G	A	A	T	T	G	C	A	G	A	CT	A	G	A	A	G	G	C	C	T	T	G	C	A	T	G	G	G	G	C	C	C	CA	A	C	A	T	A	T	C	A	G	A	T	G	G
[truncated: 68 more columns]
