# Supplementary material for: Mitochondrial DNA and Y chromosome reveal the genetic structure of the native Polish Konik horse population
Source: PeerJ. 2024 Jun 20;12:e17549. doi: 10.7717/peerj.17549 (PMC11193968; doi:10.7717/peerj.17549)
Supplement: Supplemental Information 3 — For each sample, the information includes its dam line, and haplotype classification as well as the variants located between positions 15,542 and 16,611. [file peerj-12-17549-s003.xlsx]

## Sheet: Arkusz1
			Position in reference sequence X79547.1
Sample ID	Dam line	Haplotype	15542	15585	15597	15598	15601	15602	15604	15615	15616	15617	15635	15650	15659	15666	15667	15672	15703	15762	15766	15769	15770	15771	15775	15776	15777	15806	15807	15810	15811	15826	15827	15868	15870	15871	15956	15974	15995	15996	16007	16022	16540	16543	16546	16551	16557_16558insC	16559	16611
K1	Białka	HT1	T	G	G	T	T	T	G	A	A	T	C	G	T	A	A	G	T	G	C	T	C	C	C	T	A	C	C	A	C	A	A	T	T	C	G	T	A	T	T	T	C	T	T	G	⸱	C	A
K2	Białka	HT1	T	G	G	T	T	T	G	A	A	T	C	G	T	A	A	G	T	G	C	T	C	C	C	T	A	C	C	A	C	A	A	T	T	C	G	T	A	T	T	T	C	T	T	G	⸱	C	A
K3	Białka	HT1	T	G	G	T	T	T	G	A	A	T	C	G	T	A	A	G	T	G	C	T	C	C	C	T	A	C	C	A	C	A	A	T	T	C	G	T	A	T	T	T	C	T	T	G	⸱	C	A
K4	Białka	HT1	T	G	G	T	T	T	G	A	A	T	C	G	T	A	A	G	T	G	C	T	C	C	C	T	A	C	C	A	C	A	A	T	T	C	G	T	A	T	T	T	C	T	T	G	⸱	C	A
K5	Białka	HT1	T	G	G	T	T	T	G	A	A	T	C	G	T	A	A	G	T	G	C	T	C	C	C	T	A	C	C	A	C	A	A	T	T	C	G	T	A	T	T	T	C	T	T	G	⸱	C	A
K6	Białka	HT1	T	G	G	T	T	T	G	A	A	T	C	G	T	A	A	G	T	G	C	T	C	C	C	T	A	C	C	A	C	A	A	T	T	C	G	T	A	T	T	T	C	T	T	G	⸱	C	A
K7	Białka	HT1	T	G	G	T	T	T	G	A	A	T	C	G	T	A	A	G	T	G	C	T	C	C	C	T	A	C	C	A	C	A	A	T	T	C	G	T	A	T	T	T	C	T	T	G	⸱	C	A
K8	Białka	HT1	T	G	G	T	T	T	G	A	A	T	C	G	T	A	A	G	T	G	C	T	C	C	C	T	A	C	C	A	C	A	A	T	T	C	G	T	A	T	T	T	C	T	T	G	⸱	C	A
K9	Białka	HT1	T	G	G	T	T	T	G	A	A	T	C	G	T	A	A	G	T	G	C	T	C	C	C	T	A	C	C	A	C	A	A	T	T	C	G	T	A	T	T	T	C	T	T	G	⸱	C	A
K10	Bona	HT2	C	G	A	C	T	T	G	G	G	T	C	A	C	G	A	G	C	G	C	T	T	C	T	C	A	T	C	A	C	A	G	T	C	C	G	T	A	C	T	T	T	A	T	G	⸱	C	A
K11	Bona	HT2	C	G	A	C	T	T	G	G	G	T	C	A	C	G	A	G	C	G	C	T	T	C	T	C	A	T	C	A	C	A	G	T	C	C	G	T	A	C	T	T	T	A	T	G	⸱	C	A
K12	Bona	HT2	C	G	A	C	T	T	G	G	G	T	C	A	C	G	A	G	C	G	C	T	T	C	T	C	A	T	C	A	C	A	G	T	C	C	G	T	A	C	T	T	T	A	T	G	⸱	C	A
K13	Dzina I	HT3	C	A	A	T	C	T	G	A	A	T	C	A	T	G	A	G	T	G	C	T	C	C	C	T	A	C	C	A	C	G	A	T	C	C	A	C	A	T	T	T	C	A	C	G	⸱	T	A
K14	Dzina I	HT3	C	A	A	T	C	T	G	A	A	T	C	A	T	G	A	G	T	G	C	T	C	C	C	T	A	C	C	A	C	G	A	T	C	C	A	C	A	T	T	T	C	A	C	G	⸱	T	A
K15	Dzina I	HT3	C	A	A	T	C	T	G	A	A	T	C	A	T	G	A	G	T	G	C	T	C	C	C	T	A	C	C	A	C	G	A	T	C	C	A	C	A	T	T	T	C	A	C	G	⸱	T	A
K16	Dzina I	HT3	C	A	A	T	C	T	G	A	A	T	C	A	T	G	A	G	T	G	C	T	C	C	C	T	A	C	C	A	C	G	A	T	C	C	A	C	A	T	T	T	C	A	C	G	⸱	T	A
K17	Dzina I	HT3	C	A	A	T	C	T	G	A	A	T	C	A	T	G	A	G	T	G	C	T	C	C	C	T	A	C	C	A	C	G	A	T	C	C	A	C	A	T	T	T	C	A	C	G	⸱	T	A
K18	Dzina I	HT3	C	A	A	T	C	T	G	A	A	T	C	A	T	G	A	G	T	G	C	T	C	C	C	T	A	C	C	A	C	G	A	T	C	C	A	C	A	T	T	T	C	A	C	G	⸱	T	A
K19	Dzina I	HT3	C	A	A	T	C	T	G	A	A	T	C	A	T	G	A	G	T	G	C	T	C	C	C	T	A	C	C	A	C	G	A	T	C	C	A	C	A	T	T	T	C	A	C	G	⸱	T	A
K20	Dzina I	HT3	C	A	A	T	C	T	G	A	A	T	C	A	T	G	A	G	T	G	C	T	C	C	C	T	A	C	C	A	C	G	A	T	C	C	A	C	A	T	T	T	C	A	C	G	⸱	T	A
K21	Dzina I	HT3	C	A	A	T	C	T	G	A	A	T	C	A	T	G	A	G	T	G	C	T	C	C	C	T	A	C	C	A	C	G	A	T	C	C	A	C	A	T	T	T	C	A	C	G	⸱	T	A
K22	Dzina I	HT3	C	A	A	T	C	T	G	A	A	T	C	A	T	G	A	G	T	G	C	T	C	C	C	T	A	C	C	A	C	G	A	T	C	C	A	C	A	T	T	T	C	A	C	G	⸱	T	A
K23	Dzina I	HT3	C	A	A	T	C	T	G	A	A	T	C	A	T	G	A	G	T	G	C	T	C	C	C	T	A	C	C	A	C	G	A	T	C	C	A	C	A	T	T	T	C	A	C	G	⸱	T	A
K24	Dzina I	HT3	C	A	A	T	C	T	G	A	A	T	C	A	T	G	A	G	T	G	C	T	C	C	C	T	A	C	C	A	C	G	A	T	C	C	A	C	A	T	T	T	C	A	C	G	⸱	T	A
K25	Dzina I	HT3	C	A	A	T	C	T	G	A	A	T	C	A	T	G	A	G	T	G	C	T	C	C	C	T	A	C	C	A	C	G	A	T	C	C	A	C	A	T	T	T	C	A	C	G	⸱	T	A
K26	Dzina I	HT3	C	A	A	T	C	T	G	A	A	T	C	A	T	G	A	G	T	G	C	T	C	C	C	T	A	C	C	A	C	G	A	T	C	C	A	C	A	T	T	T	C	A	C	G	⸱	T	A
K27	Geneza	HT4	T	G	G	T	T	T	G	A	A	T	C	G	T	A	A	G	T	G	C	T	C	T	C	T	A	C	C	A	C	A	A	T	T	C	G	T	A	T	T	T	C	T	T	G	⸱	C	A
K28	Geneza	HT4	T	G	G	T	T	T	G	A	A	T	C	G	T	A	A	G	T	G	C	T	C	T	C	T	A	C	C	A	C	A	A	T	T	C	G	T	A	T	T	T	C	T	T	G	⸱	C	A
K29	Geneza	HT4	T	G	G	T	T	T	G	A	A	T	C	G	T	A	A	G	T	G	C	T	C	T	C	T	A	C	C	A	C	A	A	T	T	C	G	T	A	T	T	T	C	T	T	G	⸱	C	A
K30	Geneza	HT4	T	G	G	T	T	T	G	A	A	T	C	G	T	A	A	G	T	G	C	T	C	T	C	T	A	C	C	A	C	A	A	T	T	C	G	T	A	T	T	T	C	T	T	G	⸱	C	A
K31	Geneza	HT4	T	G	G	T	T	T	G	A	A	T	C	G	T	A	A	G	T	G	C	T	C	T	C	T	A	C	C	A	C	A	A	T	T	C	G	T	A	T	T	T	C	T	T	G	⸱	C	A
K32	Geneza	HT5	T	G	G	T	T	T	G	A	A	T	C	G	T	A	A	G	T	G	C	T	C	C	C	T	A	C	C	A	C	G	A	T	C	C	A	C	A	T	T	T	C	T	T	G	⸱	C	A
K33	Karolka	HT6	C	G	A	T	T	C	G	A	A	T	C	A	T	G	A	G	T	G	C	T	C	C	C	T	A	C	C	A	C	G	A	T	C	C	A	C	A	T	T	T	C	T	T	G	C	C	A
K34	Karolka	HT6	C	G	A	T	T	C	G	A	A	T	C	A	T	G	A	G	T	G	C	T	C	C	C	T	A	C	C	A	C	G	A	T	C	C	A	C	A	T	T	T	C	T	T	G	C	C	A
K35	Karolka	HT6	C	G	A	T	T	C	G	A	A	T	C	A	T	G	A	G	T	G	C	T	C	C	C	T	A	C	C	A	C	G	A	T	C	C	A	C	A	T	T	T	C	T	T	G	C	C	A
K36	Karolka	HT6	C	G	A	T	T	C	G	A	A	T	C	A	T	G	A	G	T	G	C	T	C	C	C	T	A	C	C	A	C	G	A	T	C	C	A	C	A	T	T	T	C	T	T	G	C	C	A
K37	Karolka	HT6	C	G	A	T	T	C	G	A	A	T	C	A	T	G	A	G	T	G	C	T	C	C	C	T	A	C	C	A	C	G	A	T	C	C	A	C	A	T	T	T	C	T	T	G	C	C	A
K38	Karolka	HT6	C	G	A	T	T	C	G	A	A	T	C	A	T	G	A	G	T	G	C	T	C	C	C	T	A	C	C	A	C	G	A	T	C	C	A	C	A	T	T	T	C	T	T	G	C	C	A
K39	Karolka	HT6	C	G	A	T	T	C	G	A	A	T	C	A	T	G	A	G	T	G	C	T	C	C	C	T	A	C	C	A	C	G	A	T	C	C	A	C	A	T	T	T	C	T	T	G	C	C	A
K40	Karolka	HT6	C	G	A	T	T	C	G	A	A	T	C	A	T	G	A	G	T	G	C	T	C	C	C	T	A	C	C	A	C	G	A	T	C	C	A	C	A	T	T	T	C	T	T	G	C	C	A
K41	Karolka	HT6	C	G	A	T	T	C	G	A	A	T	C	A	T	G	A	G	T	G	C	T	C	C	C	T	A	C	C	A	C	G	A	T	C	C	A	C	A	T	T	T	C	T	T	G	C	C	A
K42	Karolka	HT6	C	G	A	T	T	C	G	A	A	T	C	A	T	G	A	G	T	G	C	T	C	C	C	T	A	C	C	A	C	G	A	T	C	C	A	C	A	T	T	T	C	T	T	G	C	C	A
K43	Karolka	HT7	C	A	A	T	C	T	G	A	A	T	C	A	T	G	A	G	T	A	T	C	T	C	T	G	A	C	T	A	T	A	G	T	T	C	G	C	G	T	C	C	C	A	C	G	⸱	T	A
K44	Karolka	HT7	C	A	A	T	C	T	G	A	A	T	C	A	T	G	A	G	T	A	T	C	T	C	T	G	A	C	T	A	T	A	G	T	T	C	G	C	G	T	C	C	C	A	C	G	⸱	T	A
K45	Karolka	HT8	T	G	G	T	T	T	G	A	A	T	T	G	T	A	A	A	C	G	C	T	C	C	C	T	A	C	C	A	C	G	A	T	C	C	A	C	A	T	T	T	C	T	T	G	⸱	C	A
K46	Karolka	HT8	T	G	G	T	T	T	G	A	A	T	T	G	T	A	A	A	C	G	C	T	C	C	C	T	A	C	C	A	C	G	A	T	C	C	A	C	A	T	T	T	C	T	T	G	⸱	C	A
K47	Karolka	HT9	T	G	G	T	T	T	G	A	A	T	T	G	T	A	A	A	C	G	C	T	C	C	C	T	A	C	C	A	C	A	A	T	T	T	A	C	A	T	T	T	C	T	T	G	⸱	C	A
K48	Karolka	HT9	T	G	G	T	T	T	G	A	A	T	T	G	T	A	A	A	C	G	C	T	C	C	C	T	A	C	C	A	C	A	A	T	T	T	A	C	A	T	T	T	C	T	T	G	⸱	C	A
K49	Karolka	HT10	C	A	A	T	T	T	G	A	A	T	C	A	T	G	A	G	C	G	C	T	C	C	C	T	A	C	C	A	C	G	A	T	C	C	A	C	A	T	T	T	C	A	T	G	⸱	C	A
K50	LiliputkaI	HT11	C	A	A	T	T	C	G	A	A	T	C	G	T	A	A	G	T	G	C	T	C	C	C	T	A	C	C	G	C	G	A	T	C	C	A	C	A	T	T	T	C	T	T	G	⸱	C	A
K51	LiliputkaI	HT11	C	A	A	T	T	C	G	A	A	T	C	G	T	A	A	G	T	G	C	T	C	C	C	T	A	C	C	G	C	G	A	T	C	C	A	C	A	T	T	T	C	T	T	G	⸱	C	A
K52	LiliputkaI	HT11	C	A	A	T	T	C	G	A	A	T	C	G	T	A	A	G	T	G	C	T	C	C	C	T	A	C	C	G	C	G	A	T	C	C	A	C	A	T	T	T	C	T	T	G	⸱	C	A
K53	LiliputkaI	HT11	C	A	A	T	T	C	G	A	A	T	C	G	T	A	A	G	T	G	C	T	C	C	C	T	A	C	C	G	C	G	A	T	C	C	A	C	A	T	T	T	C	T	T	G	⸱	C	A
K54	LiliputkaI	HT11	C	A	A	T	T	C	G	A	A	T	C	G	T	A	A	G	T	G	C	T	C	C	C	T	A	C	C	G	C	G	A	T	C	C	A	C	A	T	T	T	C	T	T	G	⸱	C	A
K55	LiliputkaI	HT11	C	A	A	T	T	C	G	A	A	T	C	G	T	A	A	G	T	G	C	T	C	C	C	T	A	C	C	G	C	G	A	T	C	C	A	C	A	T	T	T	C	T	T	G	⸱	C	A
K56	LiliputkaI	HT11	C	A	A	T	T	C	G	A	A	T	C	G	T	A	A	G	T	G	C	T	C	C	C	T	A	C	C	G	C	G	A	T	C	C	A	C	A	T	T	T	C	T	T	G	⸱	C	A
K57	LiliputkaI	HT11	C	A	A	T	T	C	G	A	A	T	C	G	T	A	A	G	T	G	C	T	C	C	C	T	A	C	C	G	C	G	A	T	C	C	A	C	A	T	T	T	C	T	T	G	⸱	C	A
K58	LiliputkaI	HT11	C	A	A	T	T	C	G	A	A	T	C	G	T	A	A	G	T	G	C	T	C	C	C	T	A	C	C	G	C	G	A	T	C	C	A	C	A	T	T	T	C	T	T	G	⸱	C	A
K59	LiliputkaI	HT11	C	A	A	T	T	C	G	A	A	T	C	G	T	A	A	G	T	G	C	T	C	C	C	T	A	C	C	G	C	G	A	T	C	C	A	C	A	T	T	T	C	T	T	G	⸱	C	A
K60	LiliputkaI	HT11	C	A	A	T	T	C	G	A	A	T	C	G	T	A	A	G	T	G	C	T	C	C	C	T	A	C	C	G	C	G	A	T	C	C	A	C	A	T	T	T	C	T	T	G	⸱	C	A
K61	LiliputkaI	HT11	C	A	A	T	T	C	G	A	A	T	C	G	T	A	A	G	T	G	C	T	C	C	C	T	A	C	C	G	C	G	A	T	C	C	A	C	A	T	T	T	C	T	T	G	⸱	C	A
K62	LiliputkaI	HT11	C	A	A	T	T	C	G	A	A	T	C	G	T	A	A	G	T	G	C	T	C	C	C	T	A	C	C	G	C	G	A	T	C	C	A	C	A	T	T	T	C	T	T	G	⸱	C	A
K63	LiliputkaI	HT6	C	G	A	T	T	C	G	A	A	T	C	A	T	G	A	G	T	G	C	T	C	C	C	T	A	C	C	A	C	G	A	T	C	C	A	C	A	T	T	T	C	T	T	G	C	C	A
K64	LiliputkaI	HT6	C	G	A	T	T	C	G	A	A	T	C	A	T	G	A	G	T	G	C	T	C	C	C	T	A	C	C	A	C	G	A	T	C	C	A	C	A	T	T	T	C	T	T	G	C	C	A
K65	LiliputkaI	HT6	C	G	A	T	T	C	G	A	A	T	C	A	T	G	A	G	T	G	C	T	C	C	C	T	A	C	C	A	C	G	A	T	C	C	A	C	A	T	T	T	C	T	T	G	C	C	A
K66	LiliputkaI	HT12	C	G	A	T	T	C	G	A	A	C	C	G	T	A	A	G	T	G	C	T	C	C	C	T	A	C	C	A	C	G	A	T	C	C	A	C	A	T	T	T	C	T	T	G	⸱	C	A
K67	LiliputkaI	HT12	C	G	A	T	T	C	G	A	A	C	C	G	T	A	A	G	T	G	C	T	C	C	C	T	A	C	C	A	C	G	A	T	C	C	A	C	A	T	T	T	C	T	T	G	⸱	C	A
K68	LiliputkaI	HT12	C	G	A	T	T	C	G	A	A	C	C	G	T	A	A	G	T	G	C	T	C	C	C	T	A	C	C	A	C	G	A	T	C	C	A	C	A	T	T	T	C	T	T	G	⸱	C	A
K69	Misia II	HT13	C	A	A	T	T	T	G	A	A	T	C	A	T	G	A	G	T	G	C	T	C	T	C	T	A	C	T	A	C	A	G	T	T	T	A	C	A	T	T	T	C	T	T	G	⸱	C	A
K70	Misia II	HT13	C	A	A	T	T	T	G	A	A	T	C	A	T	G	A	G	T	G	C	T	C	T	C	T	A	C	T	A	C	A	G	T	T	T	A	C	A	T	T	T	C	T	T	G	⸱	C	A
K71	Misia II	HT13	C	A	A	T	T	T	G	A	A	T	C	A	T	G	A	G	T	G	C	T	C	T	C	T	A	C	T	A	C	A	G	T	T	T	A	C	A	T	T	T	C	T	T	G	⸱	C	A
K72	Misia II	HT14	C	G	A	C	T	T	G	G	G	T	C	A	T	G	A	G	C	G	C	T	T	C	T	T	A	T	C	A	C	A	G	T	C	T	G	T	A	C	T	T	T	A	T	G	⸱	C	A
K73	Misia II	HT14	C	G	A	C	T	T	G	G	G	T	C	A	T	G	A	G	C	G	C	T	T	C	T	T	A	T	C	A	C	A	G	T	C	T	G	T	A	C	T	T	T	A	T	G	⸱	C	A
K74	Misia II	HT15	C	G	A	C	T	T	G	G	G	T	C	A	T	G	A	G	C	G	C	T	C	C	C	T	A	C	C	A	C	A	G	T	C	T	A	C	A	T	T	C	T	A	T	G	⸱	C	A
K75	Ponętna	HT16	C	A	A	T	T	T	A	A	A	T	C	A	T	G	A	G	C	G	C	T	C	C	C	T	A	C	C	A	C	G	A	T	C	C	A	C	A	T	T	T	C	A	T	G	C	C	A
K76	Ponętna	HT16	C	A	A	T	T	T	A	A	A	T	C	A	T	G	A	G	C	G	C	T	C	C	C	T	A	C	C	A	C	G	A	T	C	C	A	C	A	T	T	T	C	A	T	G	C	C	A
K77	Ponętna	HT16	C	A	A	T	T	T	A	A	A	T	C	A	T	G	A	G	C	G	C	T	C	C	C	T	A	C	C	A	C	G	A	T	C	C	A	C	A	T	T	T	C	A	T	G	C	C	A
K78	Ponętna	HT16	C	A	A	T	T	T	A	A	A	T	C	A	T	G	A	G	C	G	C	T	C	C	C	T	A	C	C	A	C	G	A	T	C	C	A	C	A	T	T	T	C	A	T	G	C	C	A
K79	Ponętna	HT17	C	A	A	T	T	T	A	A	A	T	C	A	T	G	A	G	C	G	C	T	C	C	C	T	A	C	C	A	C	A	A	T	T	C	A	C	A	T	T	T	C	A	T	G	C	C	A
K80	Ponętna	HT17	C	A	A	T	T	T	A	A	A	T	C	A	T	G	A	G	C	G	C	T	C	C	C	T	A	C	C	A	C	A	A	T	T	C	A	C	A	T	T	T	C	A	T	G	C	C	A
K81	Ponętna	HT17	C	A	A	T	T	T	A	A	A	T	C	A	T	G	A	G	C	G	C	T	C	C	C	T	A	C	C	A	C	A	A	T	T	C	A	C	A	T	T	T	C	A	T	G	C	C	A
K82	Ponętna	HT18	C	A	A	T	T	T	A	A	A	T	C	A	T	G	A	G	C	A	T	C	T	C	T	G	A	C	T	A	T	A	G	C	T	C	G	C	G	T	C	C	C	A	T	G	C	C	G
K83	Ponętna	HT18	C	A	A	T	T	T	A	A	A	T	C	A	T	G	A	G	C	A	T	C	T	C	T	G	A	C	T	A	T	A	G	C	T	C	G	C	G	T	C	C	C	A	T	G	C	C	G
K84	Ponętna	HT9	T	G	G	T	T	T	G	A	A	T	T	G	T	A	A	A	C	G	C	T	C	C	C	T	A	C	C	A	C	A	A	T	T	C	A	C	A	T	T	T	C	T	T	G	⸱	C	A
K85	Popielica	HT19	C	A	A	T	T	T	G	A	A	T	C	A	T	G	A	G	T	G	C	T	C	T	C	T	A	C	T	A	C	A	G	T	T	T	A	C	A	T	T	T	C	T	T	G	⸱	C	A
K86	Popielica	HT19	C	A	A	T	T	T	G	A	A	T	C	A	T	G	A	G	T	G	C	T	C	T	C	T	A	C	T	A	C	A	G	T	T	T	A	C	A	T	T	T	C	T	T	G	⸱	C	A
K87	Popielica	HT19	C	A	A	T	T	T	G	A	A	T	C	A	T	G	A	G	T	G	C	T	C	T	C	T	A	C	T	A	C	A	G	T	T	T	A	C	A	T	T	T	C	T	T	G	⸱	C	A
K88	Popielica	HT19	C	A	A	T	T	T	G	A	A	T	C	A	T	G	A	G	T	G	C	T	C	T	C	T	A	C	T	A	C	A	G	T	T	T	A	C	A	T	T	T	C	T	T	G	⸱	C	A
K89	Popielica	HT19	C	A	A	T	T	T	G	A	A	T	C	A	T	G	A	G	T	G	C	T	C	T	C	T	A	C	T	A	C	A	G	T	T	T	A	C	A	T	T	T	C	T	T	G	⸱	C	A
K90	Popielica	HT19	C	A	A	T	T	T	G	A	A	T	C	A	T	G	A	G	T	G	C	T	C	T	C	T	A	C	T	A	C	A	G	T	T	T	A	C	A	T	T	T	C	T	T	G	⸱	C	A
K91	Popielica	HT19	C	A	A	T	T	T	G	A	A	T	C	A	T	G	A	G	T	G	C	T	C	T	C	T	A	C	T	A	C	A	G	T	T	T	A	C	A	T	T	T	C	T	T	G	⸱	C	A
K92	Popielica	HT19	C	A	A	T	T	T	G	A	A	T	C	A	T	G	A	G	T	G	C	T	C	T	C	T	A	C	T	A	C	A	G	T	T	T	A	C	A	T	T	T	C	T	T	G	⸱	C	A
K93	Popielica	HT19	C	A	A	T	T	T	G	A	A	T	C	A	T	G	A	G	T	G	C	T	C	T	C	T	A	C	T	A	C	A	G	T	T	T	A	C	A	T	T	T	C	T	T	G	⸱	C	A
K94	Popielica	HT19	C	A	A	T	T	T	G	A	A	T	C	A	T	G	A	G	T	G	C	T	C	T	C	T	A	C	T	A	C	A	G	T	T	T	A	C	A	T	T	T	C	T	T	G	⸱	C	A
K95	Popielica	HT19	C	A	A	T	T	T	G	A	A	T	C	A	T	G	A	G	T	G	C	T	C	T	C	T	A	C	T	A	C	A	G	T	T	T	A	C	A	T	T	T	C	T	T	G	⸱	C	A
K96	Tarpanka I	HT20	C	A	A	T	T	T	A	A	A	T	C	A	T	G	A	G	C	G	C	T	C	C	C	T	A	C	C	A	C	G	A	T	C	C	A	C	A	T	T	T	C	A	T	G	⸱	C	A
K97	Tarpanka I	HT20	C	A	A	T	T	T	A	A	A	T	C	A	T	G	A	G	C	G	C	T	C	C	C	T	A	C	C	A	C	G	A	T	C	C	A	C	A	T	T	T	C	A	T	G	⸱	C	A
K98	Tarpanka I	HT20	C	A	A	T	T	T	A	A	A	T	C	A	T	G	A	G	C	G	C	T	C	C	C	T	A	C	C	A	C	G	A	T	C	C	A	C	A	T	T	T	C	A	T	G	⸱	C	A
K99	Tarpanka I	HT20	C	A	A	T	T	T	A	A	A	T	C	A	T	G	A	G	C	G	C	T	C	C	C	T	A	C	C	A	C	G	A	T	C	C	A	C	A	T	T	T	C	A	T	G	⸱	C	A
K100	Tarpanka I	HT20	C	A	A	T	T	T	A	A	A	T	C	A	T	G	A	G	C	G	C	T	C	C	C	T	A	C	C	A	C	G	A	T	C	C	A	C	A	T	T	T	C	A	T	G	⸱	C	A
K101	Tarpanka I	HT20	C	A	A	T	T	T	A	A	A	T	C	A	T	G	A	G	C	G	C	T	C	C	C	T	A	C	C	A	C	G	A	T	C	C	A	C	A	T	T	T	C	A	T	G	⸱	C	A
K102	Tarpanka I	HT20	C	A	A	T	T	T	A	A	A	T	C	A	T	G	A	G	C	G	C	T	C	C	C	T	A	C	C	A	C	G	A	T	C	C	A	C	A	T	T	T	C	A	T	G	⸱	C	A
K103	Tarpanka I	HT20	C	A	A	T	T	T	A	A	A	T	C	A	T	G	A	G	C	G	C	T	C	C	C	T	A	C	C	A	C	G	A	T	C	C	A	C	A	T	T	T	C	A	T	G	⸱	C	A
K104	Tarpanka I	HT20	C	A	A	T	T	T	A	A	A	T	C	A	T	G	A	G	C	G	C	T	C	C	C	T	A	C	C	A	C	G	A	T	C	C	A	C	A	T	T	T	C	A	T	G	⸱	C	A
K105	Tarpanka I	HT21	C	A	A	T	C	T	G	A	A	T	C	A	T	G	A	G	T	G	C	T	C	C	C	T	A	C	C	A	C	G	A	T	C	C	A	C	A	T	T	T	C	A	C	G	⸱	T	A
K106	Tarpanka I	HT21	C	A	A	T	C	T	G	A	A	T	C	A	T	G	A	G	T	G	C	T	C	C	C	T	A	C	C	A	C	G	A	T	C	C	A	C	A	T	T	T	C	A	C	G	⸱	T	A
K107	Tarpanka I	HT21	C	A	A	T	C	T	G	A	A	T	C	A	T	G	A	G	T	G	C	T	C	C	C	T	A	C	C	A	C	G	A	T	C	C	A	C	A	T	T	T	C	A	C	G	⸱	T	A
K108	Tarpanka I	HT21	C	A	A	T	C	T	G	A	A	T	C	A	T	G	A	G	T	G	C	T	C	C	C	T	A	C	C	A	C	G	A	T	C	C	A	C	A	T	T	T	C	A	C	G	⸱	T	A
K109	Tarpanka I	HT21	C	A	A	T	C	T	G	A	A	T	C	A	T	G	A	G	T	G	C	T	C	C	C	T	A	C	C	A	C	G	A	T	C	C	A	C	A	T	T	T	C	A	C	G	⸱	T	A
K110	Tarpanka I	HT21	C	A	A	T	C	T	G	A	A	T	C	A	T	G	A	G	T	G	C	T	C	C	C	T	A	C	C	A	C	G	A	T	C	C	A	C	A	T	T	T	C	A	C	G	⸱	T	A
K111	Tarpanka I	HT22	C	G	A	T	T	C	G	A	A	T	C	A	T	G	A	G	T	G	C	T	C	C	C	T	A	C	C	A	C	G	A	T	C	C	A	C	A	T	T	T	C	T	T	G	⸱	C	A
K112	Tarpanka I	HT22	C	G	A	T	T	C	G	A	A	T	C	A	T	G	A	G	T	G	C	T	C	C	C	T	A	C	C	A	C	G	A	T	C	C	A	C	A	T	T	T	C	T	T	G	⸱	C	A
K113	Tarpanka I	HT22	C	G	A	T	T	C	G	A	A	T	C	A	T	G	A	G	T	G	C	T	C	C	C	T	A	C	C	A	C	G	A	T	C	C	A	C	A	T	T	T	C	T	T	G	⸱	C	A
K114	Tarpanka I	HT19	C	A	A	T	T	T	G	A	A	T	C	A	T	G	A	G	T	G	C	T	C	T	C	T	A	C	T	A	C	A	G	T	T	T	A	C	A	T	T	T	C	T	T	G	⸱	C	A
K115	Tarpanka I	HT23	T	G	G	T	T	T	G	A	A	T	C	G	T	A	A	G	T	G	C	T	C	C	C	T	A	C	C	A	C	G	A	T	C	C	A	C	A	T	T	T	C	A	T	G	⸱	C	A
K116	Traszka	HT24	C	G	A	T	T	T	G	A	A	C	C	A	C	G	A	G	T	G	C	T	C	C	C	T	A	C	C	A	C	G	A	T	C	C	A	C	A	T	T	T	C	A	C	G	⸱	T	A
K117	Traszka	HT24	C	G	A	T	T	T	G	A	A	C	C	A	C	G	A	G	T	G	C	T	C	C	C	T	A	C	C	A	C	G	A	T	C	C	A	C	A	T	T	T	C	A	C	G	⸱	T	A
K118	Traszka	HT24	C	G	A	T	T	T	G	A	A	C	C	A	C	G	A	G	T	G	C	T	C	C	C	T	A	C	C	A	C	G	A	T	C	C	A	C	A	T	T	T	C	A	C	G	⸱	T	A
K119	Traszka	HT24	C	G	A	T	T	T	G	A	A	C	C	A	C	G	A	G	T	G	C	T	C	C	C	T	A	C	C	A	C	G	A	T	C	C	A	C	A	T	T	T	C	A	C	G	⸱	T	A
K120	Traszka	HT24	C	G	A	T	T	T	G	A	A	C	C	A	C	G	A	G	T	G	C	T	C	C	C	T	A	C	C	A	C	G	A	T	C	C	A	C	A	T	T	T	C	A	C	G	⸱	T	A
K121	Traszka	HT24	C	G	A	T	T	T	G	A	A	C	C	A	C	G	A	G	T	G	C	T	C	C	C	T	A	C	C	A	C	G	A	T	C	C	A	C	A	T	T	T	C	A	C	G	⸱	T	A
K122	Traszka	HT24	C	G	A	T	T	T	G	A	A	C	C	A	C	G	A	G	T	G	C	T	C	C	C	T	A	C	C	A	C	G	A	T	C	C	A	C	A	T	T	T	C	A	C	G	⸱	T	A
K123	Traszka	HT24	C	G	A	T	T	T	G	A	A	C	C	A	C	G	A	G	T	G	C	T	C	C	C	T	A	C	C	A	C	G	A	T	C	C	A	C	A	T	T	T	C	A	C	G	⸱	T	A
K124	Traszka	HT24	C	G	A	T	T	T	G	A	A	C	C	A	C	G	A	G	T	G	C	T	C	C	C	T	A	C	C	A	C	G	A	T	C	C	A	C	A	T	T	T	C	A	C	G	⸱	T	A
K125	Traszka	HT24	C	G	A	T	T	T	G	A	A	C	C	A	C	G	A	G	T	G	C	T	C	C	C	T	A	C	C	A	C	G	A	T	C	C	A	C	A	T	T	T	C	A	C	G	⸱	T	A
K126	Traszka	HT24	C	G	A	T	T	T	G	A	A	C	C	A	C	G	A	G	T	G	C	T	C	C	C	T	A	C	C	A	C	G	A	T	C	C	A	C	A	T	T	T	C	A	C	G	⸱	T	A
K127	Traszka	HT24	C	G	A	T	T	T	G	A	A	C	C	A	C	G	A	G	T	G	C	T	C	C	C	T	A	C	C	A	C	G	A	T	C	C	A	C	A	T	T	T	C	A	C	G	⸱	T	A
K128	Traszka	HT24	C	G	A	T	T	T	G	A	A	C	C	A	C	G	A	G	T	G	C	T	C	C	C	T	A	C	C	A	C	G	A	T	C	C	A	C	A	T	T	T	C	A	C	G	⸱	T	A
K129	Traszka	HT24	C	G	A	T	T	T	G	A	A	C	C	A	C	G	A	G	T	G	C	T	C	C	C	T	A	C	C	A	C	G	A	T	C	C	A	C	A	T	T	T	C	A	C	G	⸱	T	A
K130	Traszka	HT24	C	G	A	T	T	T	G	A	A	C	C	A	C	G	A	G	T	G	C	T	C	C	C	T	A	C	C	A	C	G	A	T	C	C	A	C	A	T	T	T	C	A	C	G	⸱	T	A
K131	Traszka	HT24	C	G	A	T	T	T	G	A	A	C	C	A	C	G	A	G	T	G	C	T	C	C	C	T	A	C	C	A	C	G	A	T	C	C	A	C	A	T	T	T	C	A	C	G	⸱	T	A
K132	Traszka	HT24	C	G	A	T	T	T	G	A	A	C	C	A	C	G	A	G	T	G	C	T	C	C	C	T	A	C	C	A	C	G	A	T	C	C	A	C	A	T	T	T	C	A	C	G	⸱	T	A
K133	Traszka	HT24	C	G	A	T	T	T	G	A	A	C	C	A	C	G	A	G	T	G	C	T	C	C	C	T	A	C	C	A	C	G	A	T	C	C	A	C	A	T	T	T	C	A	C	G	⸱	T	A
K134	Traszka	HT24	C	G	A	T	T	T	G	A	A	C	C	A	C	G	A	G	T	G	C	T	C	C	C	T	A	C	C	A	C	G	A	T	C	C	A	C	A	T	T	T	C	A	C	G	⸱	T	A
K135	Traszka	HT24	C	G	A	T	T	T	G	A	A	C	C	A	C	G	A	G	T	G	C	T	C	C	C	T	A	C	C	A	C	G	A	T	C	C	A	C	A	T	T	T	C	A	C	G	⸱	T	A
K136	Traszka	HT24	C	G	A	T	T	T	G	A	A	C	C	A	C	G	A	G	T	G	C	T	C	C	C	T	A	C	C	A	C	G	A	T	C	C	A	C	A	T	T	T	C	A	C	G	⸱	T	A
K137	Traszka	HT24	C	G	A	T	T	T	G	A	A	C	C	A	C	G	A	G	T	G	C	T	C	C	C	T	A	C	C	A	C	G	A	T	C	C	A	C	A	T	T	T	C	A	C	G	⸱	T	A
K138	Traszka	HT24	C	G	A	T	T	T	G	A	A	C	C	A	C	G	A	G	T	G	C	T	C	C	C	T	A	C	C	A	C	G	A	T	C	C	A	C	A	T	T	T	C	A	C	G	⸱	T	A
K139	Traszka	HT24	C	G	A	T	T	T	G	A	A	C	C	A	C	G	A	G	T	G	C	T	C	C	C	T	A	C	C	A	C	G	A	T	C	C	A	C	A	T	T	T	C	A	C	G	⸱	T	A
K140	Traszka	HT24	C	G	A	T	T	T	G	A	A	C	C	A	C	G	A	G	T	G	C	T	C	C	C	T	A	C	C	A	C	G	A	T	C	C	A	C	A	T	T	T	C	A	C	G	⸱	T	A
K141	Traszka	HT24	C	G	A	T	T	T	G	A	A	C	C	A	C	G	A	G	T	G	C	T	C	C	C	T	A	C	C	A	C	G	A	T	C	C	A	C	A	T	T	T	C	A	C	G	⸱	T	A
K142	Traszka	HT25	C	G	A	T	T	T	G	A	A	C	C	A	C	G	A	G	T	G	C	T	C	C	C	T	A	C	C	A	C	A	A	T	C	C	A	C	A	T	T	T	C	A	C	G	⸱	T	A
K143	Traszka	HT25	C	G	A	T	T	T	G	A	A	C	C	A	C	G	A	G	T	G	C	T	C	C	C	T	A	C	C	A	C	A	A	T	C	C	A	C	A	T	T	T	C	A	C	G	⸱	T	A
K144	Traszka	HT25	C	G	A	T	T	T	G	A	A	C	C	A	C	G	A	G	T	G	C	T	C	C	C	T	A	C	C	A	C	A	A	T	C	C	A	C	A	T	T	T	C	A	C	G	⸱	T	A
K145	Traszka	HT25	C	G	A	T	T	T	G	A	A	C	C	A	C	G	A	G	T	G	C	T	C	C	C	T	A	C	C	A	C	A	A	T	C	C	A	C	A	T	T	T	C	A	C	G	⸱	T	A
K146	Traszka	HT25	C	G	A	T	T	T	G	A	A	C	C	A	C	G	A	G	T	G	C	T	C	C	C	T	A	C	C	A	C	A	A	T	C	C	A	C	A	T	T	T	C	A	C	G	⸱	T	A
K147	Traszka	HT25	C	G	A	T	T	T	G	A	A	C	C	A	C	G	A	G	T	G	C	T	C	C	C	T	A	C	C	A	C	A	A	T	C	C	A	C	A	T	T	T	C	A	C	G	⸱	T	A
K148	Traszka	HT25	C	G	A	T	T	T	G	A	A	C	C	A	C	G	A	G	T	G	C	T	C	C	C	T	A	C	C	A	C	A	A	T	C	C	A	C	A	T	T	T	C	A	C	G	⸱	T	A
K149	Traszka	HT25	C	G	A	T	T	T	G	A	A	C	C	A	C	G	A	G	T	G	C	T	C	C	C	T	A	C	C	A	C	A	A	T	C	C	A	C	A	T	T	T	C	A	C	G	⸱	T	A
K150	Traszka	HT25	C	G	A	T	T	T	G	A	A	C	C	A	C	G	A	G	T	G	C	T	C	C	C	T	A	C	C	A	C	A	A	T	C	C	A	C	A	T	T	T	C	A	C	G	⸱	T	A
K151	Traszka	HT26	C	G	A	T	T	T	G	A	A	C	C	A	C	G	A	G	T	A	T	C	T	C	T	G	A	C	T	A	T	A	G	C	T	C	G	C	G	T	C	C	C	A	C	G	⸱	T	A
K152	Traszka	HT26	C	G	A	T	T	T	G	A	A	C	C	A	C	G	A	G	T	A	T	C	T	C	T	G	A	C	T	A	T	A	G	C	T	C	G	C	G	T	C	C	C	A	C	G	⸱	T	A
K153	Traszka	HT26	C	G	A	T	T	T	G	A	A	C	C	A	C	G	A	G	T	A	T	C	T	C	T	G	A	C	T	A	T	A	G	C	T	C	G	C	G	T	C	C	C	A	C	G	⸱	T	A
K154	Traszka	HT27	T	G	G	T	T	T	G	A	A	T	T	G	T	A	A	A	C	G	C	T	C	C	C	T	A	C	C	A	C	G	A	T	C	C	A	C	A	T	T	T	C	A	C	G	⸱	T	A
K155	Traszka	HT27	T	G	G	T	T	T	G	A	A	T	T	G	T	A	A	A	C	G	C	T	C	C	C	T	A	C	C	A	C	G	A	T	C	C	A	C	A	T	T	T	C	A	C	G	⸱	T	A
K156	Traszka	HT27	T	G	G	T	T	T	G	A	A	T	T	G	T	A	A	A	C	G	C	T	C	C	C	T	A	C	C	A	C	G	A	T	C	C	A	C	A	T	T	T	C	A	C	G	⸱	T	A
K157	Traszka	HT28	C	G	A	T	T	T	G	A	A	C	C	A	C	G	A	G	T	G	C	T	C	T	C	T	A	C	T	A	C	A	A	T	T	C	A	C	A	T	T	T	C	A	C	G	⸱	T	A
K158	Traszka	HT28	C	G	A	T	T	T	G	A	A	C	C	A	C	G	A	G	T	G	C	T	C	T	C	T	A	C	T	A	C	A	A	T	T	C	A	C	A	T	T	T	C	A	C	G	⸱	T	A
K159	Traszka	HT29	C	A	A	T	T	T	A	A	A	T	C	A	T	G	A	G	C	G	C	T	C	C	C	T	A	C	T	A	C	A	A	C	C	C	A	C	A	T	C	C	C	A	T	G	⸱	C	A
K160	Tunguska	HT30	C	G	A	T	T	C	G	A	A	T	C	A	T	G	A	G	T	G	C	T	C	C	C	T	A	C	C	A	C	G	A	T	C	C	A	C	A	T	T	T	C	T	T	G	⸱	C	A
K161	Tunguska	HT30	C	G	A	T	T	C	G	A	A	T	C	A	T	G	A	G	T	G	C	T	C	C	C	T	A	C	C	A	C	G	A	T	C	C	A	C	A	T	T	T	C	T	T	G	⸱	C	A
K162	Tunguska	HT30	C	G	A	T	T	C	G	A	A	T	C	A	T	G	A	G	T	G	C	T	C	C	C	T	A	C	C	A	C	G	A	T	C	C	A	C	A	T	T	T	C	T	T	G	⸱	C	A
K163	Tunguska	HT30	C	G	A	T	T	C	G	A	A	T	C	A	T	G	A	G	T	G	C	T	C	C	C	T	A	C	C	A	C	G	A	T	C	C	A	C	A	T	T	T	C	T	T	G	⸱	C	A
K164	Tunguska	HT30	C	G	A	T	T	C	G	A	A	T	C	A	T	G	A	G	T	G	C	T	C	C	C	T	A	C	C	A	C	G	A	T	C	C	A	C	A	T	T	T	C	T	T	G	⸱	C	A
K165	Tunguska	HT30	C	G	A	T	T	C	G	A	A	T	C	A	T	G	A	G	T	G	C	T	C	C	C	T	A	C	C	A	C	G	A	T	C	C	A	C	A	T	T	T	C	T	T	G	⸱	C	A
K166	Tunguska	HT30	C	G	A	T	T	C	G	A	A	T	C	A	T	G	A	G	T	G	C	T	C	C	C	T	A	C	C	A	C	G	A	T	C	C	A	C	A	T	T	T	C	T	T	G	⸱	C	A
K167	Tunguska	HT30	C	G	A	T	T	C	G	A	A	T	C	A	T	G	A	G	T	G	C	T	C	C	C	T	A	C	C	A	C	G	A	T	C	C	A	C	A	T	T	T	C	T	T	G	⸱	C	A
K168	Tunguska	HT30	C	G	A	T	T	C	G	A	A	T	C	A	T	G	A	G	T	G	C	T	C	C	C	T	A	C	C	A	C	G	A	T	C	C	A	C	A	T	T	T	C	T	T	G	⸱	C	A
K169	Tunguska	HT30	C	G	A	T	T	C	G	A	A	T	C	A	T	G	A	G	T	G	C	T	C	C	C	T	A	C	C	A	C	G	A	T	C	C	A	C	A	T	T	T	C	T	T	G	⸱	C	A
K170	Tunguska	HT30	C	G	A	T	T	C	G	A	A	T	C	A	T	G	A	G	T	G	C	T	C	C	C	T	A	C	C	A	C	G	A	T	C	C	A	C	A	T	T	T	C	T	T	G	⸱	C	A
K171	Tunguska	HT30	C	G	A	T	T	C	G	A	A	T	C	A	T	G	A	G	T	G	C	T	C	C	C	T	A	C	C	A	C	G	A	T	C	C	A	C	A	T	T	T	C	T	T	G	⸱	C	A
K172	Tunguska	HT30	C	G	A	T	T	C	G	A	A	T	C	A	T	G	A	G	T	G	C	T	C	C	C	T	A	C	C	A	C	G	A	T	C	C	A	C	A	T	T	T	C	T	T	G	⸱	C	A
K173	Tygryska	HT31	C	G	A	T	T	C	G	A	A	C	C	G	T	A	A	G	T	G	C	T	C	C	C	T	A	C	C	A	C	G	A	T	C	C	A	C	A	T	T	T	C	T	T	G	⸱	C	A
K174	Tygryska	HT31	C	G	A	T	T	C	G	A	A	C	C	G	T	A	A	G	T	G	C	T	C	C	C	T	A	C	C	A	C	G	A	T	C	C	A	C	A	T	T	T	C	T	T	G	⸱	C	A
K175	Tygryska	HT31	C	G	A	T	T	C	G	A	A	C	C	G	T	A	A	G	T	G	C	T	C	C	C	T	A	C	C	A	C	G	A	T	C	C	A	C	A	T	T	T	C	T	T	G	⸱	C	A
K176	Tygryska	HT31	C	G	A	T	T	C	G	A	A	C	C	G	T	A	A	G	T	G	C	T	C	C	C	T	A	C	C	A	C	G	A	T	C	C	A	C	A	T	T	T	C	T	T	G	⸱	C	A
K177	Tygryska	HT31	C	G	A	T	T	C	G	A	A	C	C	G	T	A	A	G	T	G	C	T	C	C	C	T	A	C	C	A	C	G	A	T	C	C	A	C	A	T	T	T	C	T	T	G	⸱	C	A
K178	Tygryska	HT32	C	A	A	T	T	T	A	A	A	T	C	A	T	G	A	G	C	A	T	T	T	C	T	T	A	C	T	A	T	A	G	T	T	C	G	C	G	T	T	T	C	A	T	G	⸱	C	A
K179	Tygryska	HT33	C	A	A	T	T	T	A	A	A	T	C	A	T	G	A	G	C	A	T	C	T	C	T	G	A	C	T	A	T	A	G	C	T	C	G	C	G	T	C	C	C	A	T	G	⸱	C	A
K180	Urszulka	HT34	T	G	G	T	T	T	G	A	A	T	C	G	T	A	A	A	C	G	C	T	C	C	C	T	A	C	C	A	C	G	A	T	C	C	A	C	A	T	T	T	C	T	T	G	⸱	C	A
K181	Urszulka	HT34	T	G	G	T	T	T	G	A	A	T	C	G	T	A	A	A	C	G	C	T	C	C	C	T	A	C	C	A	C	G	A	T	C	C	A	C	A	T	T	T	C	T	T	G	⸱	C	A
K182	Urszulka	HT34	T	G	G	T	T	T	G	A	A	T	C	G	T	A	A	A	C	G	C	T	C	C	C	T	A	C	C	A	C	G	A	T	C	C	A	C	A	T	T	T	C	T	T	G	⸱	C	A
K183	Urszulka	HT34	T	G	G	T	T	T	G	A	A	T	C	G	T	A	A	A	C	G	C	T	C	C	C	T	A	C	C	A	C	G	A	T	C	C	A	C	A	T	T	T	C	T	T	G	⸱	C	A
K184	Urszulka	HT34	T	G	G	T	T	T	G	A	A	T	C	G	T	A	A	A	C	G	C	T	C	C	C	T	A	C	C	A	C	G	A	T	C	C	A	C	A	T	T	T	C	T	T	G	⸱	C	A
K185	Urszulka	HT34	T	G	G	T	T	T	G	A	A	T	C	G	T	A	A	A	C	G	C	T	C	C	C	T	A	C	C	A	C	G	A	T	C	C	A	C	A	T	T	T	C	T	T	G	⸱	C	A
K186	Urszulka	HT34	T	G	G	T	T	T	G	A	A	T	C	G	T	A	A	A	C	G	C	T	C	C	C	T	A	C	C	A	C	G	A	T	C	C	A	C	A	T	T	T	C	T	T	G	⸱	C	A
K187	Urszulka	HT34	T	G	G	T	T	T	G	A	A	T	C	G	T	A	A	A	C	G	C	T	C	C	C	T	A	C	C	A	C	G	A	T	C	C	A	C	A	T	T	T	C	T	T	G	⸱	C	A
K188	Urszulka	HT34	T	G	G	T	T	T	G	A	A	T	C	G	T	A	A	A	C	G	C	T	C	C	C	T	A	C	C	A	C	G	A	T	C	C	A	C	A	T	T	T	C	T	T	G	⸱	C	A
K189	Urszulka	HT34	T	G	G	T	T	T	G	A	A	T	C	G	T	A	A	A	C	G	C	T	C	C	C	T	A	C	C	A	C	G	A	T	C	C	A	C	A	T	T	T	C	T	T	G	⸱	C	A
K190	Urszulka	HT35	T	G	G	T	T	T	G	A	A	T	T	G	T	A	A	A	C	G	C	T	C	C	C	T	A	C	C	A	C	A	A	T	T	T	A	C	A	T	T	T	C	T	T	G	⸱	C	A
K191	Urszulka	HT35	T	G	G	T	T	T	G	A	A	T	T	G	T	A	A	A	C	G	C	T	C	C	C	T	A	C	C	A	C	A	A	T	T	T	A	C	A	T	T	T	C	T	T	G	⸱	C	A
K192	Urszulka	HT35	T	G	G	T	T	T	G	A	A	T	T	G	T	A	A	A	C	G	C	T	C	C	C	T	A	C	C	A	C	A	A	T	T	T	A	C	A	T	T	T	C	T	T	G	⸱	C	A
K193	Urszulka	HT35	T	G	G	T	T	T	G	A	A	T	T	G	T	A	A	A	C	G	C	T	C	C	C	T	A	C	C	A	C	A	A	T	T	T	A	C	A	T	T	T	C	T	T	G	⸱	C	A
K194	Urszulka	HT35	T	G	G	T	T	T	G	A	A	T	T	G	T	A	A	A	C	G	C	T	C	C	C	T	A	C	C	A	C	A	A	T	T	T	A	C	A	T	T	T	C	T	T	G	⸱	C	A
K195	Urszulka	HT35	T	G	G	T	T	T	G	A	A	T	T	G	T	A	A	A	C	G	C	T	C	C	C	T	A	C	C	A	C	A	A	T	T	T	A	C	A	T	T	T	C	T	T	G	⸱	C	A
K196	Urszulka	HT35	T	G	G	T	T	T	G	A	A	T	T	G	T	A	A	A	C	G	C	T	C	C	C	T	A	C	C	A	C	A	A	T	T	T	A	C	A	T	T	T	C	T	T	G	⸱	C	A
K197	Urszulka	HT35	T	G	G	T	T	T	G	A	A	T	T	G	T	A	A	A	C	G	C	T	C	C	C	T	A	C	C	A	C	A	A	T	T	T	A	C	A	T	T	T	C	T	T	G	⸱	C	A
K198	Urszulka	HT35	T	G	G	T	T	T	G	A	A	T	T	G	T	A	A	A	C	G	C	T	C	C	C	T	A	C	C	A	C	A	A	T	T	T	A	C	A	T	T	T	C	T	T	G	⸱	C	A
K199	Urszulka	HT36	C	G	G	T	T	T	G	A	A	T	C	G	T	A	A	A	C	G	C	T	C	C	C	T	A	C	C	A	C	A	A	T	T	C	A	C	A	T	T	T	C	T	T	G	⸱	C	A
K200	Urszulka	HT36	C	G	G	T	T	T	G	A	A	T	C	G	T	A	A	A	C	G	C	T	C	C	C	T	A	C	C	A	C	A	A	T	T	C	A	C	A	T	T	T	C	T	T	G	⸱	C	A
K201	Urszulka	HT37	C	A	A	T	T	C	G	A	A	T	C	G	T	A	A	G	T	A	T	C	T	C	T	G	A	C	C	A	T	A	G	C	T	C	A	C	G	T	C	C	C	T	T	G	⸱	C	A
K202	Wola	HT38	C	G	G	T	T	T	A	A	A	T	C	A	T	G	G	G	C	G	C	T	C	C	C	T	A	C	C	A	C	G	A	T	C	C	A	C	A	T	T	T	C	A	T	G	C	C	A
K203	Wola	HT38	C	G	G	T	T	T	A	A	A	T	C	A	T	G	G	G	C	G	C	T	C	C	C	T	A	C	C	A	C	G	A	T	C	C	A	C	A	T	T	T	C	A	T	G	C	C	A
K204	Wola	HT38	C	G	G	T	T	T	A	A	A	T	C	A	T	G	G	G	C	G	C	T	C	C	C	T	A	C	C	A	C	G	A	T	C	C	A	C	A	T	T	T	C	A	T	G	C	C	A
K205	Wola	HT38	C	G	G	T	T	T	A	A	A	T	C	A	T	G	G	G	C	G	C	T	C	C	C	T	A	C	C	A	C	G	A	T	C	C	A	C	A	T	T	T	C	A	T	G	C	C	A
K206	Wola	HT38	C	G	G	T	T	T	A	A	A	T	C	A	T	G	G	G	C	G	C	T	C	C	C	T	A	C	C	A	C	G	A	T	C	C	A	C	A	T	T	T	C	A	T	G	C	C	A
K207	Wola	HT38	C	G	G	T	T	T	A	A	A	T	C	A	T	G	G	G	C	G	C	T	C	C	C	T	A	C	C	A	C	G	A	T	C	C	A	C	A	T	T	T	C	A	T	G	C	C	A
K208	Wola	HT39	C	G	G	T	T	T	A	A	A	T	C	A	T	G	G	G	C	A	T	C	T	C	T	G	A	C	T	A	T	A	G	C	T	C	G	C	G	T	C	C	C	A	T	G	C	C	A
K209	Wola	HT39	C	G	G	T	T	T	A	A	A	T	C	A	T	G	G	G	C	A	T	C	T	C	T	G	A	C	T	A	T	A	G	C	T	C	G	C	G	T	C	C	C	A	T	G	C	C	A
K210	Wola	HT39	C	G	G	T	T	T	A	A	A	T	C	A	T	G	G	G	C	A	T	C	T	C	T	G	A	C	T	A	T	A	G	C	T	C	G	C	G	T	C	C	C	A	T	G	C	C	A
K211	Wola	HT39	C	G	G	T	T	T	A	A	A	T	C	A	T	G	G	G	C	A	T	C	T	C	T	G	A	C	T	A	T	A	G	C	T	C	G	C	G	T	C	C	C	A	T	G	C	C	A
K212	Wola	HT39	C	G	G	T	T	T	A	A	A	T	C	A	T	G	G	G	C	A	T	C	T	C	T	G	A	C	T	A	T	A	G	C	T	C	G	C	G	T	C	C	C	A	T	G	C	C	A
K213	Zaza	HT20	C	A	A	T	T	T	A	A	A	T	C	A	T	G	A	G	C	G	C	T	C	C	C	T	A	C	C	A	C	G	A	T	C	C	A	C	A	T	T	T	C	A	T	G	⸱	C	A
K214	Zaza	HT20	C	A	A	T	T	T	A	A	A	T	C	A	T	G	A	G	C	G	C	T	C	C	C	T	A	C	C	A	C	G	A	T	C	C	A	C	A	T	T	T	C	A	T	G	⸱	C	A
K215	Zaza	HT20	C	A	A	T	T	T	A	A	A	T	C	A	T	G	A	G	C	G	C	T	C	C	C	T	A	C	C	A	C	G	A	T	C	C	A	C	A	T	T	T	C	A	T	G	⸱	C	A
K216	Zaza	HT20	C	A	A	T	T	T	A	A	A	T	C	A	T	G	A	G	C	G	C	T	C	C	C	T	A	C	C	A	C	G	A	T	C	C	A	C	A	T	T	T	C	A	T	G	⸱	C	A
K217	Zaza	HT20	C	A	A	T	T	T	A	A	A	T	C	A	T	G	A	G	C	G	C	T	C	C	C	T	A	C	C	A	C	G	A	T	C	C	A	C	A	T	T	T	C	A	T	G	⸱	C	A
K218	Zaza	HT20	C	A	A	T	T	T	A	A	A	T	C	A	T	G	A	G	C	G	C	T	C	C	C	T	A	C	C	A	C	G	A	T	C	C	A	C	A	T	T	T	C	A	T	G	⸱	C	A
K219	Zaza	HT20	C	A	A	T	T	T	A	A	A	T	C	A	T	G	A	G	C	G	C	T	C	C	C	T	A	C	C	A	C	G	A	T	C	C	A	C	A	T	T	T	C	A	T	G	⸱	C	A
K220	Zaza	HT33	C	A	A	T	T	T	A	A	A	T	C	A	T	G	A	G	C	A	T	C	T	C	T	G	A	C	T	A	T	A	G	C	T	C	G	C	G	T	C	C	C	A	T	G	⸱	C	A
K221	Zaza	HT33	C	A	A	T	T	T	A	A	A	T	C	A	T	G	A	G	C	A	T	C	T	C	T	G	A	C	T	A	T	A	G	C	T	C	G	C	G	T	C	C	C	A	T	G	⸱	C	A
K222	Zaza	HT33	C	A	A	T	T	T	A	A	A	T	C	A	T	G	A	G	C	A	T	C	T	C	T	G	A	C	T	A	T	A	G	C	T	C	G	C	G	T	C	C	C	A	T	G	⸱	C	A
K223	Zaza	HT33	C	A	A	T	T	T	A	A	A	T	C	A	T	G	A	G	C	A	T	C	T	C	T	G	A	C	T	A	T	A	G	C	T	C	G	C	G	T	C	C	C	A	T	G	⸱	C	A
K224	Zaza	HT33	C	A	A	T	T	T	A	A	A	T	C	A	T	G	A	G	C	A	T	C	T	C	T	G	A	C	T	A	T	A	G	C	T	C	G	C	G	T	C	C	C	A	T	G	⸱	C	A
K225	Zaza	HT40	T	A	G	T	T	T	G	G	A	T	T	G	T	A	A	G	C	G	C	T	C	C	C	T	A	C	C	A	C	A	A	T	T	C	A	C	A	T	T	T	C	T	T	G	C	C	A
K226	Zaza	HT40	T	A	G	T	T	T	G	G	A	T	T	G	T	A	A	G	C	G	C	T	C	C	C	T	A	C	C	A	C	A	A	T	T	C	A	C	A	T	T	T	C	T	T	G	C	C	A
K227	Zaza	HT40	T	A	G	T	T	T	G	G	A	T	T	G	T	A	A	G	C	G	C	T	C	C	C	T	A	C	C	A	C	A	A	T	T	C	A	C	A	T	T	T	C	T	T	G	C	C	A
K228	Zaza	HT40	T	A	G	T	T	T	G	G	A	T	T	G	T	A	A	G	C	G	C	T	C	C	C	T	A	C	C	A	C	A	A	T	T	C	A	C	A	T	T	T	C	T	T	G	C	C	A
K229	Zaza	HT41	C	A	A	T	T	T	A	A	A	T	C	A	T	G	A	G	C	A	C	C	C	C	C	G	A	C	C	A	C	A	A	C	C	C	A	C	A	T	C	C	C	A	T	G	⸱	C	A
K230	Zaza	HT41	C	A	A	T	T	T	A	A	A	T	C	A	T	G	A	G	C	A	C	C	C	C	C	G	A	C	C	A	C	A	A	C	C	C	A	C	A	T	C	C	C	A	T	G	⸱	C	A
K231	Zaza	HT41	C	A	A	T	T	T	A	A	A	T	C	A	T	G	A	G	C	A	C	C	C	C	C	G	A	C	C	A	C	A	A	C	C	C	A	C	A	T	C	C	C	A	T	G	⸱	C	A
K232	Zaza	HT42	C	A	A	T	T	C	G	A	A	T	C	G	T	A	A	G	T	G	C	T	C	T	C	T	G	C	C	A	T	A	A	T	C	C	G	C	A	T	T	T	C	A	T	G	⸱	C	A
K233	Zaza	HT43	C	A	A	T	T	T	A	A	A	T	C	A	T	G	A	G	C	G	C	T	C	T	C	T	G	C	C	A	T	A	A	T	C	C	G	C	A	T	T	T	C	A	T	A	⸱	C	A
